# Supplementary material for: Convergent Canonical Pathways in Autism Spectrum Disorder from Proteomic, Transcriptomic and DNA Methylation Data
Source: Preprints.org preprint supplement (doi:10.20944/preprints202109.0109.v1), 2021-09-06
Supplement: Supplementary file 1 [file supplementary]

## Sheet: Supplementary Table S1
Supplementary Table 1: Full datasets collated from the ASD proteomic, transcriptomic and DNA methylation studies described in Table 1. Each dataset represents the list of genes found to be significantly associated in ASD after data processing and statistical analyses, converted into NCBI ENTREZ IDs.
Type of Study	Transcriptomic												Proteomic														DNA Methylation
Reference	(Tylee et al. 2017)	(Mordaunt et al. 2019)	(Gao et al. 2020)	(He et al. 2019)	(He et al. 2019)	(He et al. 2019)	(He et al. 2019)	(Forés-Martos et al. 2019)	(Rahman et al. 2020)	(Wright et al. 2017)	(Yao et al. 2021)	(Ramaswami et al. 2020)	(Hewitson et al. 2021)		(Shen et al. 2019)		(Shen et al. 2018)		(Yang et al. 2018)		(Yao et al. 2021)		(Abraham et al. 2019)				(Mordaunt et al. 2020)	(Hu et al. 2020)	(Wong et al. 2019)	(Ramaswami et al. 2020)	(Stathopoulous et al 2020)
Dataset No.	1	2	3	4	5	6	7	8	9	10	11	12	13		14		15		16		17		18		19		20	21	22	23	24
Tissue Type	Blood				Brain tissue								Blood										Brain tissue				Blood		Brain tissue		Buccal cells
Description of Dataset from the publication	90 DE genes in ASD (p<0.05)	172 DE genes in ASD (p<0.01).	3624 DE genes in ASD	DE genes in ASD (p<0.05)	DE genes in ASD (p<0.05).			1055 DE genes in ASD (p<0.05)	1567 DE genes in ASD (p<0.05)	1463 DE genes in ASD (p<0.05)	364 DE genes in ASD.	5200 DE genes (FDR<0.05)	358 DE proteins in ASD (FDR < 0.05).		41 DE proteins in ASD		24 DE proteins in ASD		Eight biomarker peaks with higher expression in ASD.		59 genes predicted to encode ASD-related blood-secretory proteins. Six proteins were validated using an ELISA.		146 DE proteins from brain area 19 (BA19) in ASD(p < 0.05)		191 DE proteins in cerebellum in ASD (p < 0.05) .		537 DM genes in both discovery and replication sets in males	181 DM genes that overlap between the discovery and validation groups MALES	Top ranked ASD-associated DM probes in the cross-cortex model incorporating both prefrontal cortex (PFC) and temporal cortex (TC) data.	DM genes in Promoter (FDR<0.05).	898 DM genes (p<0.05).
	NCBI ENTREZ ID												Protein	Gene ENTREZ ID	Protein	Gene ENTREZ ID	Protein	Gene ENTREZ ID	Protein	Gene ENTREZ ID	Protein	Gene ENTREZ ID	Protein	Gene ENTREZ ID	Protein	Gene ENTREZ ID	NCBI ENTREZ ID
	3557	30001	100506860	2999	245908	6775	780851	26511	3258613	64844	16	121504	14-3-3-protein-theta	10971	ACO2	50	ACTG1	71	APOC1	341	AARS	16	LRPPRC	10128	HNRNPDL	9987	111	26574	645323	8353	153684
	654350	159686	253868	4818	390155	4744	340542	10248	3450740	729852	80755	3012	14-3-3-protein-zeta/delta	7534	AHNAK	79026	ACTN1	87	CPB2	1361	ACLY	47	FLOT1	10211	PHYHIP	9796	146	18	27018	102465906	100131635
	8976	677842	96597	9410	401011	5122	8089	22950	4835948	110354863	23456	3018	17-beta-HSD-1	3292	ALB	213	AGT	183	FABP1	2168	ACTL6B	51412	TUBB3	10381	KIAA0513	9764	286	26154	148362	8352	100287944
	4736	644767	101927331	10578	145645	3290	7432	509	5001470	109616978	23457	554313	40S-ribosomal-protein-SA	3921	ANXA11	311	APOE	348	FGA	2243	ACTR1B	10120	ATP8A1	10396	CD47	961	301	21	54067	8350	84680
	122525	101929745	100128594	9022	84951	404216	116541	10653	10047641	106866914	23	8294	a2-Macroglobulin	2	APOA1	335	C3	718	PF4	5196	ARHGEF4	50649	MYL12A	10627	HOMER3	9454	357	23457	57132	83482	47
	6128	101929730	100996255	1521	6317	4502	54958	192683	6164997	106707243	25864	8329	ABL2	27	ATP5F1A	498	C5	727	SERPINA5	5104	ARMC8	25852	CHL1	10752	GRHPR	9380	394	4363	286097	8148	55856
	4306	28581	440119	6846	131368	23022	64130	221120	6524135	106481929	84448	8330	Activated protein C	5624	ATP5F1B	506	CALM1	801	TAAR6	319100	ATPAF1*,§	64756	AHCYL1	10768	NRXN3	9369	399	9429	4998	8968	8310
	388344	2672	100505666	3824	653613	2670	100129086	23164	6587972	106481807	84320	8331	AGGRECAN	176	C3	718	CALM2	805			CDK5RAP1	51654	NCKAP1	10787	CADPS2	93664	412	7920	94104	8358	2182
	7754	4521	338758	83888	407	7454	391833	5709	6691314	106481790	47	8332	AGR2	10551	CALR	811	CALM3	808			CERK	64781	PRDX3	10935	IGSF8	93185	651	101928844	80209		170692
	6208	102724532	440993	2537	94033	5156	1349	1809	7630958	106481402	51412	8335	AIF1	199	CBX3	11335	CALR	811			COPG	22820	HIBADH	11112	CD9	928	781	100287944	100128327	102723385	83440
	124801	155038	100133669	8530	220429	54541	112703	55225	9931943	106481388	10120	8336	ALCAM	214	DLD	1738	EHD3	30845			CPSF3	51692	STRAP	11171	SYT12	91683	868	154761	84300	101927550	152
	3094	100302222	102723448	642869	11227	6518	205251	94240	11323463	106481383	64431	8339	aldolase-A	226	ETFA	2108	ENO1	2023			DDX1	1653	ACOT7	11332	AIFM1	9131	959	340357	94160	56260	84830
	6218	28660	101928741	5531	283694	2995	646527	338811	20428785	106481310	113622	8342	ALK1	94	FLOT1	10211	FBLN1	2192			DHX35	60625	CIRBP	1153	H1-10	8971	1004	101928708	150000	65988	10554
	6217	6222	50618	1968	6528	1837	81853	5316	15638806	106481189	54806	8343	amyloid-precursor-protein	351	FLOT2	2319	FERMT3	83706			DPP8	54878	CLTB	1212	BSN	8927	1010	23205	25	125050	64902
	644972	106481566	60592	7531	283093	1890	643336	5567	17048156	106481172	221120	8344	ANGIOPOIETIN2	285	GLUD1	2746	FN1	2335			EPHB6	51603	CLTC	1213	SYNJ1	8867	1016	203102	175	58496	54806
	388363	100616371	114770	682	2791	684	641848	7566	25140012	106480965	57037	8345	ANGPL4	51129	GOT2	2806	IGFALS	3483			EPS15	2051	ADH5	128	SUCLA2	8803	1415	11173	64853	401127	204
	22927	29909	57122	3001	2627	187	84300	2021	18497164	106480799	147463	8346	ANTITHROMBINIII	2147	GPD2	2820	ITGA2B	3674			ETS2	2060	VCAN	1462	CBR1	873	1573	104	54890	100507373	11216
	2205	100132057	728392	28951	163882	5552	342977	9754	21306655	106480553	310	8347	Apo-D	347	HSP90B1	7184	MAPRE2	10982			EXOC3(SEC6L1)	2114	CST3	1471	SLC4A4	8671	1748	105	7840	10975	9495
	6169	11326	138639	7049	51302	8673	645968	79038	4678886	106480131	321	8348	APOM	55937	HSPA5	3309	PARVB	29780			EXTL1	11336	CTNNB1	1499	CADPS	8618	1946	115	246	388963	56052
	26270	126638	85463	6351	3118	1436	641849	199675	7362714	106479984	10307	83482	ARMEL	7873	HSPA9	3313	SERPINA1	5265			FTO	2134	DDX3X	1654	SLC25A12	8604	1959	283383	651746	8778	91801
	116149	101059918	10570	254863	7048	3936	6227	6036	8568427	106479902	55738	8350	ARSB	411	HSPD1	3329	SERPINA4	5267			GFM1	79068	DECR1	1666	BCAS1	8537	2020	165082	10565	105378405	347902
	4603	339416	6342	916	23533	4616	51693	118471	11096547	106479817	9826	8351	ARYLSULFATASEA	410	HYOU1	10525	THBS1	7057			GFRA2	85476	CYB5R3	1727	IGSF21	84966	2042	139378	10678	4714	270
	5729	574500	56896	5551	402317	23643	84316	7122		106479728	50649	8352	ASGR1	432	IDH2	3418	TLN1	7094			GLMN	2675	DLG2	1740	CAT	847	2045	127	572	105377371	283
	126068	56891	1808	4061	127385	1535	84233	10797	100130417	106479723	400	8353	ASM3A	604	IQGAP1	8826	VCL	7414			KCTD9	11146	DLG4	1742	DPY30	84661	2047	55256	653	90632	27329
	140623	285759	340554	3004	613211	4071	440063	54541	100133985	106479618	25852	8354	ATP-synthase-beta-chain	506	ITIH4	3700	VCP	7415			LIMK1	54793	DYNC1H1	1778	PHYHIPL	84457	2070	132	6046	105370809	404734
	124222	9073	65056	6967	9127	51129	51699	79887	100507487	106479495	64860	8355	B2	28907	LBP	3929	VTN	7448			MAPK10	3984	DUSP3	1845	CAPN2	824	2104	125061	53339	387644	23141
	2879	100302232	51479	6983	64147	220382	4712	10616	100507534	106479072	79754	8356	BASI	682	LCP1	3936					METTL13(KIAA0859)	5602	EEF1A1	1915	SFXN3	81855	2188	123624	162681	105369550	27063
	27351	84847	255798	55851	7102	10581	255758	2357	101927560	105373378	28990	8357	BCAM	4059	LMNB1	4001					NEPRO(C3orf17)	25871	A2M	2	CAMK2D	817	2290	26523	797	51735	84832
	114799	100131176	151647	2821	132228	6281	113246	56948	101927587	104413891	55054	8358	BCAR3	708	LMNB2	84823					NFXL1	152518	ALB	213	CAMK2B	816	2334	27161	800	105374002	389161
	140715	3546	116349	1984	11037	9123	653156	56829	101927924	102800317	476	8359	BCL6	953	MDH2	4191					PAM	5066	FASN	2194	AP3B2	8120	2346	189	831	100533105	301
	6194	100873499	23048	4282	55017	10410	5805	219749	101928738	102724668	481	8360	BDNF	627	ME2	4200					PCSK1	5122	FGA	2243	DGLUCY	80017	2555	79026	8646	101927359	100874264
	6890	440288	80712	81618	8190	84868	10935	6817	101929511	101929423	498	8361	BFL1	597	P4HB	5034					PFKM	5213	FGB	2244	CALB1	793	2888	158067	91612	100379224	324
	5272	56670	8633	116541	54440	8644	3094	22990	105373984	101929293	513	8362	BGH3	7045	PLEC	5339					PGBD1	84547	FGG	2266	AHNAK	79026	2897	10000	25932	60677	57136
	6189	100616668	7559	11140	55020	3303	148014	80273	107986266	101927547	516	8363	BGN	633	SAMHD1	25939					PIK3R4	30849	FKBP4	2288	CA8	767	2898	59344	1303	5893	338
	6126	283665	7564	125988	63910	7052	145553	3779	151475	101234262	537	8364	BMP1	649	SERPINA1	5265					POLR3C	10623	CLSTN1	22883	CA4	762	3175	249	51117	14	60489
	83666	100423025	100506175	284207	112858	400818	1346	79953	283575	100874315	529	8365	BMP10	27302	SERPIND1	3053					PPP2R1A	5518	RUFY3	22902	CA2	760	3354	64682	1593	50	342
	219988	3805	352990	645	8547	7076	126328	2810	340017	100873865	64756	8366	BMP6	654	STOM	2040					PPP2R2B	5521	SIRT2	22933	CA1	759	3355	51433	9201	148	89872
	8728	23541	9637	7384	302	58191	64805	126789	400579	100873853	26033	8367	BOC	91653	UQCRC2	7385					PPP3CA	5530	FLOT2	2319	VIM	7431	3547	285	84301	154	55082
	85028	28825	80228	26578	27036	125050	6119	9474	400958	100873825	9331	8368	BPI	671	USP9X	8239					PREPL	9581	ESYT1	23344	TUBB2A	7280	3600	287	29118	206	9824
	54541	442903	10628	5790	5155	1052	28978	4067	101927895	100873521	7917	8370	BRF1	2972	VDAC3	7419					PRKAA1	5562	FKBP8	23770	TNR	7143	3617	441459	54849	240	100505585
	9917	100302167	79887	5929	229	7276	10632	57644	100289650	100873295	64919	85235	BSP	967	VIM	7431					RAD1	5810	AK5	26289	TF	7018	3747	170961	10260	241	9138
	6152	153745	8725	9040	79865	4973	260434	3725	100506885	100862680	644	8968	C1ESTERASEINHIBITOR	710							RARS	5917	GFAP	2670	TALDO1	6888	3973	651746	10979	283	54622
	378938	6701	56681	553115	84957	11067	8382	7025	100527943	100533496	51286	8969	C1QBP	1013							RBSN(ZFYVE20)	64145	CACYBP	27101	SYP	6855	4133	196527	2246	307	10123
	57168	140803	6472	6352	388714	1192	2987	121551	100861510	100529264	7862	3347821	C1QR1	1120							RGS7	6000	GNAS	2778	SYN2	6854	4153	100507053	2268	320	84071
	2206	338328	10826	400916	3918	5920	80349	29093	100874261	100526842	26580	4153858	C3B	718							RNF157	114804	PGM2L1	283209	SYN1	6853	4160	8943	3344	328	51566
	5204	6860	8131	6375	84034	649853	100129685	10962	101927043	100505881	54813	3513292	C5A	727							SLC25A12	8604	GRIA2	2891	VAMP2	6844	4225	54518	55691	338	100131755
	54458	106479554	643711	56993	55796	7305	84987	4343	101928580	100505783	60314	4225907	CAD15	1404							SLC25A27	9481	GRM3	2913	SPTBN2	6712	4258	393	23193	383	408
	26816	100128262	7571	1603	5292	8531	1337	80325	101929224	100505687	84969	3928036	Cadherin-5	1003							SLITRK5	26050	GSTM3	2947	SNAP25	6616	4646	9912	126326	391	91947
	644315	55970	81792	8409	448834	3337	1347	10607	105379054	100499177	79133	4371309	Calcineurin	1432							STAC2	342667	GSTM5	2949	SLC8A2	6543	4781	9826	56287	393	427
	100421769	106481416	219749	729288	29956	3315	388339	57216	109729180	100423036	27248	4680453	Calcineurin-B-a	5530							STAMBPL1	57559	PSAT1	29968	SLC4A1	6521	4837	25820	2794	400	100507117
	119504	23764	100128288	5479	341568	929	729769	11041	11067	100302640	89876	5923724	CALPASTATIN	831							STAU2	27067	H1-0	3005	SLC1A6	6511	4857	403	10082	409	142685
	3820	1543	11093	2746	79501	3689	4724	84262	115123	100302243	25871	5686560	CALRETICULIN	811							SYT13	57586	EHD3	30845	NDRG4	65009	4886	26225	2823	472	22926
	145767	100532724	23367	166	1755	9531	4715	94081	151011	100302209	56941	5686300	CAMK1	8536							THOC5	8563	ANXA6	309	EPS8L2	64787	4922	25852	56834	513	83734
	6135	106479862	51109	10908	55064	12	84833	57817	170371	100302159	285613	5686116	CAMK1D	1469							TPK1	27010	HINT1	3094	BLVRB	645	5099	80210	2897	523	478
	677769	106481978	171019	55615	440503	341	27247	10979	2533	100302121	112609	5762561	CASPASE3	836							TRMT11(C6orf75)	60487	HMGB1	3146	RBM3	5935	5161	420	121355	526	483
	57659	106481878	157506	51647	124801	714	79077	3123	26070	100289274	221545	7321544	CATC	1075							TTC13	79573	HMOX2	3163	RAP1GDS1	5910	5295	421	8924	527	488
	11337	106479130	4048	51282	150921	1728	1174	83706	338811	100271260	387357	6139184	CCL23	6368							TUBGCP5	114791	HNRNPH1	3187	PVALB	5816	5366	8853	3339	545	155066
	9212	378108	2948	353514	5970	8857	132299	377	339906	100271119	60487	6007907	CD27	939							VPS18	57617	HNRNPL	3191	PTBP2	58155	5449	55870	3358	549	51382
	103091864	389831	1387	5914	3659	713	514	8406	3491	100169850	55093	6065387	CD39	1604							VRK1	7443	DNAJA1	3301	PTPRZ1	5803	5523	40	57461	572	90423
	80310	89872	182	8402	167127		79785	10903	374872	100147756	81571	6094645	CD59	966									HSPA9	3313	PREX1	57580	5569	29028	182	577	563
	100128936	10885	84950	5920	219436		9556	1807	54855	100133172	79886	6446961	CD63	1663									HSP90AA1	3320	SLC12A5	57468	5621	9474	80333	583	113451
	1870	145864	29781	60314	158833		100128060	55092	55603	100131017	26256	6524335	CDCA3	83461									APOE	348	SLC17A7	57030	5789	57205	26153	595	343472
	10643	574507	84066	6036	124739		60592	10664	55765	100129424	55799	6554042	CDK1	983									ACAT1	38	PSAP	5660	5897	23250	24137	604	55212
	6139	106481581	200523	340061	2859		729403	5745	57469	100033816	8618	6648309	CDK1	983									KIF5C	3800	SEPTIN3	55964	6095	480	84623	641	56647
	102465668	8269	3897	11151	202374		727865	79442	57604	100033812	93664	6705486	CDON	1805									KRT10	3858	MAPK1	5594	6304	546	3930	677	640
	10603	55073	84280	54930	841		29902	8338	58472	100033799	57172	6715973	CG	1511									LDHA	3939	LANCL2	55915	6315	6314	55885	689	2647
	102465906	100130519	8495	100616424	26636		9553	9440	5920	100033456	23066	7239449	cGMP-stimulated-PDE	5141									MAP1B	4131	CISD1	55847	6451	127002	4008	699	282991
	163255	338429	192670	25870	55287		392285	10068	64115	100033455	826	6778597	CHK2	11200									MAP2	4133	CAND1	55832	6583	549	125336	701	26258
	319103	106479979	5349	5216	374650		64928	23493	723790	100033449	55259	6855161	CHKB	1824									MAT2A	4144	PPP3CA	5530	6664	145173	57497	705	8548
	7525	106479876	27161	26511	84617		389541	706	79742	100033442	147381	7139776	CHL1	1948									NARS1	4677	GDAP1	54332	6785	79870	23639	726	651
	3728	84503	10525	84975	4327		27089	83442	80739	100033431	55246	7143335	CHL1	2048									ACLY	47	SEPTIN5	5413	6857	7917	8581	735	729096
	91272	54187	101928335	4218	5630		653659	22981	8329	100033429	51654	7158015	CHST6	4166									NDUFA10	4705	PLEC	5339	7048	80127	57128	818	665
	645387	440804	23161	65003	10148		647030	4744	8330	100033425	1952	7188853	CJUN	3725									NEFM	4741	ATP6V1C1	528	7078	55973	84466	819	60467
	407026	100293516	7594	6688	10940		84520	55198	8332	9164872	64781	7705183	CKMB	1158									NEFL	4747	PFKM	5213	7099	594	554212	842	2186
	55110	51018	29887	4074	79651		318	633	8334	767611	90634	7523845	CLC7A	2050									ATP1A3	478	TUBA8	51807	7306	618	100302239	869	57795
	100288307	5739	8690	10263	719		28998	57181	8336	767610	131474	7651889	CLM6	10871									NRCAM	4897	ATP6V1H	51606	7399	497258	8028	891	149478
	440525	101927653	7596	51451	54756		388654	2012	8337	767606	1128	7656650	COACTOSINLIKEPROTEIN	23406									ATP2B4	493	HPCAL4	51440	7404	638	744	894	685
	646688	100873775	197407	10567	10896		9997	11177	8349	767603	84916	7709965	Coactosin-like-protein	23406									OAT	4942	PCMT1	5110	7547	54836	55173	909	689
	647276	286495	118856	3823	121364		8624	2014	83903	767596	8161	11597148	COAGULATION FACTOR IX	2158									CYRIB	51571	HDGFL3	50810	7678	84280	4534	924	10950
	27335	100873281	414201	7535	9340		730187	26589	85016	767593	22820	12643076	COAGULATIONFACTORIX	2158									CMPK1	51727	MYEF2	50804	7704	153579	10135	957	9184
	1506	100130086	3717	381	57091		9446	25870	8969	767592	51805	13958466	Coagulation-Factor-IX	2158									PEPD	5184	PRDX1	5052	7837	283461	89796	966	283598
	54543	2353	3716	9784	390053		388722	8673	9768	767589	7464	15421931	COAGULATIONFACTORVII	2155									PGD	5226	OXCT1	5019	7978	147685	23413	989	283579
	729046	7544	119391	8807	390078		654320	8140	130872	767588	1346	13518157	COFILIN 1	1072									PLEC	5339	ATP2B4	493	8321	114905	10763	991	317761
	692106	2516	1848	7376	717		51645	5359	4508	767569	10815	13959169	Cofilin-1	1072									ATP6V0A1	535	ATP2B2	491	8491	715	10725	1022	83636
	140760	7280	101928343	116540	59345		55845	5682	4509	767567	10814	14333823	COLEC12	81035									SEPTIN5	5413	NRCAM	4897	8545	55286	10886	1068	84167
	64118	145407	4323	374403	284009		100129599	5683	4519	767561	51692	15027756	COLLECTINKIDNEY1	78989									PPP3CA	5530	ATP2A2	488	8572	152940	11051	1069	126526
	118788	441177	4325	259197	26301		539	51651	4536	730092	1431	16418078	CONTACTIN1	1272									IARS2	55699	NME2	4831	8587	729	84033	1123	28974
	377381	3801	1806	10093	2012		389156	26128	4537	693220	8452	18464167	CSH	1442									SEPTIN11	55752	NME1	4830	8653	136895	55239	1147	165257
		55	4326	4145	374393		51650	1164	4538	693209	51076	17227271	CSK	1445									SEPTIN3	55964	ATP1B2	482	8708	84310	55824	1174	338761
		339983	9693	5585	10166		3251	57162	4539	693208	27065	17352426	CXCL16	58191									UGGT1	56886	ATP1B1	481	8715	100533105	9659	1181	388581
		730227	349196	83862	80216		728324	6843	4540	693175	1653	18449814	CYSTATINM	1474									DPYSL5	56896	ATP1A3	478	8821	203076	51248	1191	284546
		4995	9771	55741	158046		8743	5468	4541	693167	51428	20335961	CYTIDYLATEKINASE	51727									RTN4	57142	ATP1A1	476	8935	777	25796	1195	79078
		23421	5050	51596	3059		1353	135154	4549	693163	9681	18482251	Cytidylate-kinase	51727									ACTR3B	57180	NEFL	4747	9079	778	23126	1258	140680
		432369	401074	55829	114041		400652	5465	4550	693155	1676	19224893	CYTN	2219									PSMD13	5719	NEFH	4744	9096	8912	151742	1295	25770
		100616492	9435	10227	79760		4695	2030	400046	693147	1725	22532553	CYTOCHROMEP4503A4	1544									PTPRZ1	5803	NEFM	4741	9452	790	5532	1355	145741
		102723661	5048	1487	133690		3682	10791	102723895	692225	22907	21700550	CYTT	1470									RPL6	6128	NCAM1	4684	9586	8536	84950	1359	130813
		100132101	90313	9275	150000		54969	1738	100507521	692215	60625	21431219	DAF	2220									RPL7A	6130	MPP2	4355	9693	79092	80742	1376	100190949
		5340	26099	2014	135656		51397	9469	100288866	692200	148252	21536073	DAN	4681									RPL9	6133	ALDH6A1	4329	9723	79800	5801	1379	441150
		1310	8747	154	438		84284	389432	101927751	692198	57628	21629049	DAPK2	23604									RPS4X	6191	MAPT	4137	9865	8573	83480	1386	352999
		84889	401548	8192	256369		131118	26995	101928424	692157	54878	21693760	DCSIGNR	10332									RPS7	6201	MAP6	4135	9955	23468	84074	1401	79020
		143471	140880	116138	25929		4713	4942	101928674	692086	10231	25141057	DDR2	4921									RPS15A	6210	LTA4H	4048	9967	153733	11079	1409	100652846
		106481960	8745	55577	26085		125988	26099	101928844	677841	54920	24635949	DERM	2660									SARS1	6301	LMNA	4000	10203	93233	6091	1417	785
		494324	10551	93380	608		55863	27067	101929237	677833	1874	24757112	Desmoglein-1	1828									MAP2K4	6416	RPSA	3921	10253	165055	6400	1432	59284
		55150	285972	537	56136		55651	246330	101929653	677832	27102	31745243	Discoidin-domain-receptor-2	4921									BLVRB	645	KRT9	3857	10308	285025	10044	1434	796
		338755	5326	1153	81448		54205	340533	102723566	677829	8662	39979448	DKK3	2810									SH3GL1	6455	KRT2	3849	11096	284047	83699	1455	57658
		401312	6811	10519	4818		645058	128308	23370	677819	9844	189027226	DLL1	28514									SH3GL3	6457	KRT1	3848	11130	57639	90525	1460	119395
		389206	6809	10312	9966		10465	5695	283038	677815	2026	215214096	DLL4	2896									KLC2	64837	ACAT1	38	22903	6359	6564	1477	23473
		100422892	2054	2805	402057		140823	2135	283335	677808	956	225322409	DPP2	3098									SLC1A3	6507	ITPR1	3708	23002	899	140775	1585	835
		164127	25803	1647	85416		390354	5692	400553	677807	23136	288557412	DR6	3381									SLC1A4	6509	IDH2	3418	23209	79616	55084	1606	257062
		100506506	54583	8799	23581		653505	5693	19	677800	2051	329755369	DRAK2	4025									MARCKSL1	65108	APOA1	335	23281	146894	57537	1660	200014
		100287879	8930	7351	439940		440145	83891	23460	677799	2060	3941725	DSC2	4088									SLC8A2	6543	HSP90AA1	3320	23301	965	6694	1665	347475
		56936	9994	8721	441177		729985	7351	94160	677796	2114	4572570	DSG1	1828									SNAP25	6616	HSPA9	3313	23362	8872	6710	1729	126661
		2643	112399	22827	168400		100134273	6696	64137	677775	5393	8151953	DYRK3	4147									SPTBN1	6711	HPCAL1	3241	23414	996	54434	1733	55246
		340198	57589	10963	1527		10923	7769	171586	677765	2134	3550033	EFNB2	4148									SPTBN2	6712	HP	3240	23469	988	9399	1740	8030
		284600	638	6184	4250		51079	7768	63874	654502	2135	4375898	EGF	1950									TALDO1	6888	HK1	3098	23503	157313	25777	1742	26112
		5370	4152	3661	131669		23328	54681	51225	653232	92002	4741457	ELASTASE	1991									TF	7018	ANXA6	309	25793	1012	341359	1743	891
		51175	8932	10959	10410		26011	7673	84448	653226	84895	4760256	EMR2	4914									ICAM5	7087	EHD3	30845	25834	64072	90019	1788	9738
		106481553	100652824	4696	84419		148867	54931	11332	652965	145773	4775446	Endocan	4916									TPT1	7178	HBD	3045	25913	1002	6904	1797	401145
		103344931	90203	308	149998		100128288	4190	84519	646405	2254	4902782	ENDOGLIN	2022									C3	718	HBB	3043	26333	53841	7156	1802	948
		767609	79856	23344	400754		3482	26033	8038	645784	2271	6523629	ENDOSTATIN	80781									C4A	720	HBA2	3040	26984	8621	79979	1828	963
		28699	6895	9158	7021		4071	8287	8745	644896	9158	6981901	ENPP7	339221									UQCRC2	7385	HBA1	3039	27012	1029	26995	1834	8941
		100873358	285761	79001	64768		5351	9312	9510	594838	60509	6982079	ENTEROKINASE	5651									DGLUCY	80017	HADH	3033	27112	125931	146057	1836	1056
		143379	112574	5699	83756		1282	548596	81792	574408	64777	7009555	EPHA5	2044									USP5	8078	HADHB	3032	27133	57214	10054	1839	64946
		5888	399979	124801	256302		9289	6774	11173	574406	129804	7340726	EPHB2	4919									CALR	811	HADHA	3030	27253	64946	85451	1846	389857
		114793	7621	51021	197131		23368	201229	56999	553115	64838	8218009	EPHB4	4958									CAMK2B	816	HSD17B10	3028	27430	79682	55031	1849	80817
		106481158	64089	445347	55454		10215	84898	101929335	541468	79068	9213094	EPHB6	2051									ARPC5L	81873	H1-5	3009	27445	1108	80326	1894	84902
		106479768	57231	10577	60490		644571	5696	92949	494115	139341	7768038	EPHRINA4	1945									SYN3	8224	GSTP1	2950	29034	26038	7482	1938	79598
		1036	29907	203068	140766		9931	705	55811	493812	2566	9581667	EPHRINA5	1946									HSDL2	84263	GSTM3	2947	29982	55636	7504	1955	55259
		219870	9918	677848	348738		404216	54815	116	445577	2582	8919073	EPITHELIALCELLKINASE	1969									PRXL2A	84293	GSTM2	2946	49860	55349	7517	1956	3426
		5196	129531	677850	441272		4616	26508	2015	442904	85476	8980232	Epithelial-cell-kinase	1969									GAS7	8522	GSN	2934	50945	27159	253461	1958	8837
			153339	100507246	54941		22871	5877	30817	440279	2675	9407983	ERBB1	1956									CASK	8573	PDIA3	2923	51313	1119	29068	1965	10668
			27333	101060275	643542		7049	10514	9289	408263	11146	9588637	ESAM	5008									PRKRA	8575	GRID2	2895	51438	89832	79038	1967	1114
			4065	6748	92017		22997	57128	222487	406946	27165	9755793	ETHE1	23474									USO1	8615	ANK2	287	51481	57053	84460	1995	1117
			6503	54541	137735		5725	9784	133	406912	51292	9650619	Factor-D	1675									ACTN1	87	GPM6A	2823	51557	51363	7705	2011	26511
			728012	10430	80028		348	328	146	406908	2805	9955497	FAM3B	54097									RPL14	9045	GPD2	2820	51569	23122	147929	2046	57132
			3995	3191	5337		6507	57231	165	406896	139760	9994383	FAM3D	131177									INA	9118	GNAO1	2775	53336	1366	281006	2054	83539
			641455	2771	353345		29927	401541	183	402117	114928	13396805	FAS	355									DCLK1	9201	CACYBP	27101	53942	387836	80017	2100	339145
			100499177	746	1026		54438	10840	57085	401397	134266	14269874	FASN	2194									GSTO1	9446	PPA2	27068	54088	6249	221301	2101	26586
			375743	10589	9023		27253	6503	113146	401097	3029	22316128	FCN1	5294									NPEPPS	9520	CYFIP2	26999	54363	2055	3015	2130	1163
			7389	51181	143503		1026	26137	83543	401024	404037	19699804	FCN2	5329									SEC22B	9554	GFAP	2670	54664	1209	256880	2145	54102
			51111	8904	7100		5004	83873	642597	400960	3035	14289319	FGF19	9965									PRDX6	9588	FBXO2	26232	54715	81037	2617	2254	6249
			4752	170384	3678		7132	5351	8644	400713	3017	21668474	FGFR4	2264									PHYHIP	9796	GAP43	2596	54976	23059		2310	25999
			9064	10189	10184		23013	124540	212	399947	84803	158948	FLRT2	5479									IGHM	3507	NEGR1	257194	55117	27013		2335	1201
			6885	85406	554226		6662	10129	55821	399818	54737	105374476	FLRT3	23767									HSPA1	3303	FKBP8	23770	55137	152330		2342	1207
			4217	533	130		4661	26263	240	390927	219844	84837	Flt-3	2322									SHANK3	85358	DDAH2	23564	55188	10466		2355	10978
			51588	55167	51296		56929	58191	241	390916	3382	100132111	FSTL1	5530											PSD3	23362	55790	57511		2526	123920
			3757	8666	6476		54530	30008	80216	389856	3419	100132159	FSTL3	5648											ACSL6	23305	55966	1305		2534	26504
			27133	6415	341350		7994	7389	273	389677	3420	105373813	GALECTIN7	3963											NCDN	23154	56923	1289		2535	22837
			8417	440823	89839		4026	10856	283	388695	3421	100129961	GDF11	10220											EPB41L3	23136	56979	50509		2620	7373
			286410	79888	7490		642333	5292	285	388610	55272	285987	GI24	64115											CLASP2	23122	57142	1298		2639	256076
			23200	51142	220070		23132	55972	51129	388566	9118	Z93241.1	GOT1	2805											FKBP4	2288	57689	150684		2644	150684
			23250	1019	696		1200	943	286	388558	9922	Z97055.2	gp130	3572											FH	2271	57703	1312		2648	10699
			26267	123263	8839		23332	4293	118932	388536	125113	Z97653.1	GPC6	10082											FGG	2266	58477	27151		2669	1349
			26190	1652	79413		23705	3841	91369	388272	126823	646890	GPNMB	10457											FGB	2244	58493	1363		2744	1379
			79607	100037417	283948		100134364	220963	54443	388165	9920	285074	GRANZYMEB	3002											FASN	2194	63898	57699		2779	23418
			2956	678	92421		100132394	25871	57101	387758	7881	100288842	GRN	5764											ALDH2	217	64002	1376		2788	9419
			79165	5869	150681		5451	23420	10541	387357	80333	100533800	GROA	2919											ALDH1A1	216	64582	84766		2803	9946
			9988	51024	6452		120114	1173	290	387082	54793	387820	H2A3	92815											ALB	213	64762	27297		2805	114788
			120425	738	153478		30812	51100	312	387036	51603	286460	H6ST1	9394											EPHX1	2052	64839	9586		2810	1457
			6611	84299	244		57551	91120	302	375704	23254	337873	HCC4	6360											EPB41L1	2036	79192	1428		2921	79848
			401463	29099	6899		9923	81033	389289	375484	56243	337875	HDAC8	5979											AK1	203	79366	23399		2932	11330
			6429	81876	122769		3337	157574	309	375190	26128	645321	HDGR2	84717											ELAVL3	1995	79694	1501		2961	8452
			6430	64426	64173		477	6301	321	374977	57805	102723354	HIF-1a	3091											AHSG	197	79729	5476		2963	2920
			6432	51228	80004		57680	5442	54518	374887	57576	107985194	HMG-1	3146											ECHS1	1892	79772	8451		2967	220002
			55207	8459	192134		91039	64921	27350	349565	22920	116435300	HNRNPA	3182											DYNC1H1	1778	80070	1523		2975	124637
			55904	8226	10223		868	84978	200316	349152	64837	253868	HNRNPK	3190											DNM1	1759	80146	51167		2979	51700
			727701	64981	3549		3915	7867	55911	345557	23588	100506674	HPG												DLG2	1740	80224	1535		2981	1589
			10008	10870	312		5610	167410	341	344558	51451	116435298	HPLN1	6418											DDX5	1655	80258	26999		3002	1592
			58508	2647	341116		100133233	27163	344	343450	3984	112268105	HPVE7TYPE18												ECI1	1632	80816	1571		3008	1573
			55906	9289	3566		440337	9261	348	342667	9665	100506804	HSP70	3308											CTSD	1509	80854	9266		3017	51302
			3658	126014	83482		7707	51433	80830	342357	387856	391139	HSP90B	3326											NCAN	1463	83604	9265		3029	8529
			5908	59307	53831		3725	6280	358	342184	400566	106481123	HXK1	7006											DYNLL2	140735	83867	23002		3060	1603
			8303	1155	24137		64114	11001	9824	340554	81691	92755	I-309	6346											CRMP1	1400	84189	23500		3068	55157
			286189	100128731	728039		100133950	84962	257106	340533	no mapping	651250	IFNAA	3440											SYT2	127833	84417	26094		3083	1630
			80759	2286	643834		10938	6279	100874246	338414	55222	150759	IGD	3495											RAB3C	115827	85444	64421		3093	79077
			100505893	80774	51097		1951	84100	100505585	317662	57470	554236	IGF1R	3480											PARK7	11315	85508	57706		3097	115265
			387032	79002	445328		339398	400	9138	286319	54674	100507526	IGFBP-1	3484											PRRT2	112476	89758	26220		3108	57706
			7586	5694	3808		10432	54942	9639	286101	92335	643358	IGFBP-4	3487											CHN2	1124	89795	56919		3146	163259
			50652	8733	339184		100130168	4070	128272	285878	23164	646193	IGFBP7	3490											HIBADH	11112	90316	11083		3157	8214
			91754	9046	57822		1410	23643	7984	285855	10916	439953	IGF-I	3479											PRDX3	10935	91353	22982		3163	1608
			8602	10445	54857		2532	4982	10865	285671	57692	100129961	IGFIIRECEPTOR	3482											HSPH1	10808	92345	129563		3171	51635
			3354	10970	90925		23493	53831	51326	285613	5607	642585	IL10RA	3587											NCKAP1	10787	94158	100507086		3182	57647
			6787	8631	201305		85315	64130	100506084	285521	5602	28638	IL12RB1	3594											DPYSL4	10570	113278	9229		3184	129563
			8539	6275	9718		56977	1588	132946	285513	27430	133283	IL17BR	55540											NOP56	10528	114788	22839		3196	1736
			3355	9450	1406		26137	7388	57561	285440	8720	100505832	IL17RC	84818											ACAA2	10449	116835	101926987		3198	27120
			81545	1512	4018		9283	84866	91947	285126	10873	441246	IL18BPA	10068											NDRG1	10397	120526	1756		3218	1742
			140609	10653	84081		11067	83596	653308	284697	10001	90133	IL-18-Ra	8809											CORO2B	10391	120892	134218		3219	22839
			55030	3182	91120		58499	26007	430	284611	113655	100505532	IL1B	3553											AKR1A1	10327	122183	83544		3303	9787
			6651	8668	10882		55714	5230	55723	284371	84811	10740	IL-1b	3553											IGHG1	3500	124912	1785		3313	1746
			6670	51264	4110		79157	56950	374569	284129	257415	284764	IL1R2	7850											SLC9A3R1	9368	130733	29947		3326	23317
			26648	81606	866		9123	1979	219293	283459	79154	3136	IL1RA	3554											P4HB	5034	131096	57572		3351	54943
			212	7334	3857		2615	23090	100130887	282974	55711	107080624	IL1SR9	26280													132204	285489		3383	285126
			390874	10313	27173		10226	9655	84913	282566	4355	729178	IL1SRI	3554													132430	84444		3417	22826
			8291	5499	56413		347	339344	476	266722	51069	653702	IL8	3576													133022	8110		3418	1774
			51074	11000	140711		653553	11030	478	261729	8898	55000	ILT4	10288													138009	1809		3607	58511
			23398	8895	11082		6511	6715	481	260425	9108	100131234	ILT-4	10288													138046	1826		3679	10591
			55196	9130	1475		284058	4957	487	257068	439921	728920	IMDH2	3615													139341	1838		3680	349152
			23299	3396	285033		85495	402573	490	256051	91977	152905	IR	3643													139604	115253422		3702	145837
			6697	100507739	148345		152485	4790	491	255426	64753	441733	ITIHEAVYCHAINH4	3700													139886	51143		3713	1825
			91653	51160	118980		3949	4791	492	254428	266812	100874160	kallikrein-12	43849													140689	124454		3736	79075
			54908	29882	56253		641737	3627	50617	254251	63908	645084	kallikrein-14	43847													142910	1891		3752	25778
			101928689	57291	140578		19	54552	523	254128	24142	102724820	KALLIKREIN4	9622													144245	1896		3762	51514
			55653	2950	5273		57688	134510	525	254122	83988	147228	KALLIKREIN6	5653													144455	64800		3816	1840
			91012	64951	51196		4792	6579	526	253782	81565	158078	KEAP1	9817													145581	84455		3839	344595
			8784	100534592	541473		27161	10811	529	253650	4714	100505702	KPCT	: 5588													147381	8661		3841	50506
			54832	115286	112802		83735	48	51761	252969	4725	439992	LD78BETA	6349													150160	51386		3842	1848
			55167	6634	10332		54541	10426	26033	222553	4744	220906	LECTIN	4153													151112	27436		3850	8655
			10943	79095	151636		3707	116840	9212	222537	4747	145767	LIFSR	3977													154089	55740		3939	1875
			3359	24138	440686		5166	4817	646282	222484	79858	285352	LPPL	4026													158405	219670		3963	55840
			26286	207	55254		26040	129787	93010	222255	63974	353511	LRIG3	121227													158696	150350		3964	80153
			339287	393	54067		1850	56954	105369147	222008	4799	645958	LRRK2	120892													158724	23136		3983	23644
			7132	919	2255		64651	3688	570	221908	152518	7696	LSAMP	4045													166614	22905		4034	1962
			9147	5037	83667		160728	212	25825	221656	4809	143371	LTBP4	8425													168975	157697		4035	23741
			345462	84967	140850		10628	2322	9531	221092	4905	100130758	LUMICAN	4060													170062	10613		4050	9086
			5096	826	27129		3304	8773	10538	220594	9891	54944	LY86	9450													170712	51575		4091	83939
			140775	79005	7038		6385	55005	116071	219670	79991	86123	LYMPHOTOXINA1	4049													200728	2099		4094	1967
			2107	100534012	5406		220963	5923	11177	205717	55753	100216546	Lymphotoxin-b-R	4055													202018	59271		4124	56478
			7150	56882	79831		10299	90288	8537	203260	5001	729399	LYPD3	27076													202559	54932		4140	1982
			79077	83443	23085		10410	55916	590	203190	55074	10748	M2-PK	5315													219557	10640		4182	8178
			6714	373156	160365		80042	10232	597	201931	5058	55370	MAMMAGLOBIN2	4250													221079	2140		4201	84173
			6426	84525	3338		10581	4192	83596	201627	5066	100505483	MANNOSEBINDING2	4153													221937	2146		4204	56851
			94059	9446	388199		100132942	65005	602	201158	55486	653214	MAPK14	7033													221981	7430		4212	2014
			102723661	79090	66002		727908	80069	604	200894	5073	84054	MAPK2	7060													252950	2162		4287	5167
			23120	3669	64175		51655	26220	255877	200407	56143	284393	Marapsin	7535													254065	158584		4289	56943
			4298	374395	401589		57484	10059	286554	199692	5122	645387	MASP3	8190													254910	399665		4316	2056
			200894	102465448	9708		8531	643155	618	192670	553115	374666	MATN2	8404													255061	83641		4325	1161
			1869	55204	286075		2012	3672	627	192668	246330	389416	MATN3	8412													255119	84498		4340	2081
			29979	7165	1031		4502	1725	340542	171017	5195	286480	MD2	7099													283392	79632		4361	30001
			1870	2874	5880		1052	23230	633	170685	5213	344423	MD2	23643													283463	121006		4488	2086
			101928795	11322	6473		3315	55048	146439	170556	5214	101927158	MED1	5469													284802	285550		4490	157570
			1871	51524	3491		3303	3678	332	169834	84547	729046	MFRP	83552													285555	54097		4548	55500
			26529	10459	353174		133	3936	666	169714	79960	401303	MIA	8444													285593	100129583		4597	59271
			83547	90933	2213			81844	684	169200	5261	442240	MIP5	348249													285600	222235		4629	23233
			120103	152007	284680			23645	149478	167227	9063	304	MIS	8576													338436	90342		4638	2153
			29978	6626	10581			116841	695	163115	30849	768096	MMEL2	9262													338645	2263		4643	81558
			51602	1731	138802			5631	54718	163087	26034	375295	MMP13	4322													338862	440101		4644	159090
			7555	1890	389257			5562	699	163049	5315	144568	MMP17	4326													339593	342184		4646	57579
			9778	64834	946			4712	11149	158399	25953	53947	MMP2	4313													340017	22862		4697	84908
			53346	102466723	187			715	414152	158219	29944	79719	MMP-2	4313													340107	2309		4709	51252
			6653	821	28997			140685	399947	157574	84968	22848	MMP8	4317													340618	27086		4713	27146
			3062	83593	6362			5546	387763	155435	10623	16	MMP9	4318													340895	100526835		4715	10712
			25977	3916	26339			23099	115749	154661	403313	60496	MPK2	6416													347730	118924		4735	221786
			91368	51253	11006			4708	255809	154215	51400	284837	MRC2	9578													352887	24140		4736	646851
			100130548	2944	170690			10300	284325	153129	5518	9625	MRCKB	9902													387066	2560		4739	619208
			3560	100526831	339010			333926	712	152485	5521	19	Myostatin	10272													388759	729422		4758	143684
			100270679	1978	54346			5547	713	152098	5530	10349	NAGK	55577													389207	100132399		4790	149297
			100359394	293	56288			57326	714	151556	80148	650655	NCAM120	4684													389898	729431		4820	283742
			51592	55666	4993			6302	715	151188	9055	21	NCAM-L1	3897													389906	100008586		4848	22909
			64781	54539	126410			115286	84886	150465	9581	23461	NCC27	1192													390892	2574		4850	2193
			246744	83442	55065			3428	127703	149951	5562	23460	Nectin-like-protein-2	23705													391518	2576		4901	355
			1632	374882	221			4826	717	149420	5564	23457	NME1	4830													399746	2579		4946	84467
			9738	22913	5460			10644	56245	149041	27339	85320	NOGO RECEPTOR	65078													400892	26748		4947	201456
			3386	132160	338321			23507	150248	148808	55486	94160	Notch-1	4851													400935	729408		4968	200933
			55213	56929	390093			79187	25770	148479	9266	368	NR4A3	8013													400954	645073		4976	27145
			1102	58485	4246			54765	718	148423	5708	6833	NTERMINALPROBNP	4879													401237	729442		4998	128486
			3960	79228	56269			4704	719	147906	29789	215	OBCAM	4978													401398	729396		5028	2281
			3958	55646	5920			5770	401097	146434	5746	5826	OCAD1	10752													406912	645051		5034	2287
			290	10194	128367			4701	720	146050	5816	23	OLR1	4973													406926	729447		5064	2319
			8805	80142	3449			1854	721	145567	26056	10061	OMD	10924													408029	729428		5101	23767
			26273	29927	474354			26472	728	145389	326624	114483834	OSM	11082													439933	130589		5111	2323
			3964	5714	4222			5396	285679	144983	5879	64137	PAFAH	5048													440040	57452		5116	3607
			8626	2975	7780			2302	401207	140767	5810	55347	PAI1	5054													441525	57459		5121	139628
			115761	1351	246100			7165	168090	140733	5886	26090	PAK3	5063													442247	10985		5164	118924
			387263	6815	720			8938	402573	140689	5917	51104	PAK7	57144													442459	2651		5191	2512
			29035	353	5015			4753	401546	140612	55758	58489	PARAOXONASE1	5444													442523	2665		5241	2553
			26232	54921	160492			8803	389766	140461	6000	11057	P-Cadherin	1001													494118	126326		5245	126626
			100188953	382	7287			25977	771	139886	114804	171586	PCI	5104													552889	144423		5281	11227
			100113407	283635	1111			9577	762	139322	8731	63874	PCSK7	9159													619554	51053		5290	2628
			686	101927178	259307			91683	9478	138649	26750	51099	PDE2A	5138													641516	2774		5291	79571
			6646	29058	654			6750	57010	138241	84816	57406	PDE4D	5144													642633	54584		5295	284161
			83716	23550	400891			4256	93589	138046	23623	10006	PDE7A	5150													642976	2803		5298	220032
			4815	9703	338567			4591	27092	137886	112611	25890	PDL2	80380													643711	2804		5303	50628
			283596	51780	1827			25814	8618	137868	81846	84448	PEDF	5176													643827	65056		5310	54438
			4495	5546	392376			60682	93664	135293	192683	58527	PERIOSTIN	10631													644669	10082		5324	2706
			79890	4720	5739			3776	84254	135152	6330	29777	PERL	11167													645369	115330		5378	2742
			89870	5698	474171			5774	10486	135138	6389	80325	PIK3CA	5290													645949	2863		5394	51022
			10107	5696	23746			2051	147968	135114	11336	100506411	PIK3R1	5295													646396	2898		5423	10539
			54453	57085	6348			8812	10753	134728	10291	100132215	PIM1	5292													647107	9569		5430	27165
			1066	2517	170589			51493	100505812	134359	57794	101927837	PK3CG	22918													653427	2975		5438	2775
			4493	28974	79188			3384	834	134218	6456	105369779	PLCG1	5335													693125	728411		5440	2780
			55362	4860	338661			5550	837	134147	56961	105378231	PLG	5340													693180	1404		5454	55204
			1660	581	6752			55623	840	133308	51091	100506274	PLXB2	23654													727905	285834		5455	51026
			6383	91544	5359			3430	117144	132949	51310	100130111	PPIB	23768													727982	610		5459	54865
			143884	7458	3700			79770	865	132001	8604	101927809	PPID	5481													728450	113802		5507	60313
			22890	822	5029			124936	147381	131544	9481	101930370	Prolactin-Receptor	5618													729177	283755		5510	54707
			152641	6185	5350			51304	140689	131408	64924	100419170	PROTEASENEXINI	5270													729307	440248		5518	51184
			100507303	55272	1672			388284	149483	131034	10463	400627	Protein-disulfide-isomerase-A3	2923													730811	204851		5527	56927
			79842	10552	79635			55213	387856	130888	84912	400553	Protein-S	5627													100113404	7290		5591	344561
			57621	1201	159371			51191	151887	130752	22950	10449	Prothrombin	1732746292													100126320	6927		5608	23432
			5314	961	126014			720	885	129881	55117	27034	PRSS22	64063													100126323	3172		5619	2842
			9145	5631	8578			3958	6347	129401	388662	28976	PTN	27122													100126341	101927219		5649	2844
			55937	5588	3219			4502	9133	129080	26050	35	PTP1B	5770													100126447	3183		5662	54329
			644135	8677	4312			23167	1230	128869	79811	37	PYY	5697													100128811	399949		5709	9737
			6596	25828	7128			257236	1234	128553	6596	23527	REG4	83998													100128993	9455		5713	29899
			51669	7812	256394			3965	929	128414	6620	39	RELT	27242													100129434	84376		5718	2880
			23012	64781	79924			529	9332	128387	54861	55331	RET	29952													100129520	101929664		5745	2891
			338707	313	2533			388931	4064	128308	9784	57007	RGMA	30817													100131997	3200		5770	100093698
			583	80273	51429			373	912	128077	6651	47	RGMB	50937													100133053	10855		5780	219409
			80307	55716	83451			387263	933	126823	8404	48	RGMC	148738													100133920	59340		5814	2968
			7525	23171	60482			2043	57124	126731	10011	11332	RNF43	51734													100144748	64711		5825	55766
			220042	23193	10875			534	11314	126231	6731	23597	ROBO2	6092													100288814	266722		5861	3020
			23483	221184	54757			79796	951	126075	342667	51	RON	4486													100289574	11077		5863	3021
			51430	1059	874			956	960	125150	57559	8309	ROR1	54567													100302136	3313		5872	201562
			23218	80709	79574			286053	922	124976	6775	52	RUXF	6636													100302225	3418		5875	26061
			23438	5496	9294			4071	924	124790	27067	53	RXFP1	59350													100302267	169355		5878	401022
			5747	684	6374			10227	971	124454	11198	51205	SCGFALPHA	6320													100313772	28981		5888	79804
			10276	5073	222663			4489	942	124152	6854	23205	SECTM1	6398													100313824	57549		5905	54801
			683	3683	386680			64838	22918	124044	23208	80221	SEM6A	57556													100422830	339834		5912	10767
			100505881	101928879	440570			27068	4267	123355	57586	2182	SEM6B	10501													100422867	22806		5913	9734
			9358	10095	388503			83716	11135	123263	84258	51703	SEPR	54894													100422937	55540		5931	79654
			6382	100505585	1443			10421	157313	123036	6894	79611	SET	54940													100499171	133396		5933	92797
			26224	8815	51233			8407	1010	122553	6919	86	SFRP3	2487													100500834	3568		5936	3070
			26234	51504	440738			139596	64405	121601	200132	51412	SH21A	4068													100500869	3572		5955	55363
			22879	6836	3662			29114	1005	121504	7014	88	SHPS1	140885													100505881	64423		5968	26091
			7161	79602	55894			84709	5218	120114	80764	81	SICAM1	3383													100505929	3632		5982	3087
			23431	11047	8115			10112	1017	119710	8563	10121	SIG14	100049587													100505978	203522		6005	25994
			152078	55696	2967			80216	1018	117154	7095	10120	SIGLEC3	945													100506311	3843		6018	123346
			9709	5691	267012			10221	1026	117143	55529	10097	SLAMF5	8832													100506368	4033		6038	51501
			10492	27166	3683			27249	90273	116984	80021	57180	SLIK1	55576													100506433	3654		6046	148738
			5530	51042	2300			51365	1052	116443	7139	653857	SLIK5	26050													100506474	3683		6048	3119
			5108	401331	22918			57210	27443	116372	9868	100	SLPI	6590													100506585	3691		6050	3122
			5532	102725198	346528			114821	1062	116328	7155	4185	SMAC	56616													100506627	9358		6059	3139
			11064	10113	7142			388569	100653515	116138	7167	8038	SMAD3	55869													100506677	3700		6082	100873945
			27241	57326	6036			51299	55165	115950	27010	6868	Soggy-1	27120													100506827	3707		6084	3156
			26227	79008	140			284656	348807	115703	7216	53616	SOMATOSTATIN28	6750													100507058	3708		6118	3218
			28964	548593	54436			50651	286464	114824	64061	8745	SOST	50964													100507201	3717		6171	3238
			101927814	101929864	3891			57156	220136	114786	7265	203102	SPARCL1	56848													100507377	3756		6199	3239
			139716	54732	390195			8799	55997	114784	79573	101	SPHK1	8877													100507528	56660		6206	3240
			55660	23204	51744			51286	3075	114625	83538	9509	SPHK2	56963													100616180	3782		6207	60495
			55917	7045	124773			522	3426	112858	114791	11095	SPONDIN1	10418													100616302	84678		6222	51170
			57826	3692	3047			754	9023	94241	63893	56999	STAB2	57118													100616334	5927		6237	51478
			255488	2739	3012			539	1113	94134	8266	92949	STAT3	6774													100616363	9856		6253	3306
			27324	56910	9531			23708	1114	94097	84993	105	STAT6	6778													100616475	285600		6263	203100
			5912	5093	718			22907	1116	94081	134510	23536	STC1	6781													100616489	100652824		6272	54768
			79811	100529063	2014			55322	1117	94032	51377	134637	STK16	79258													100652772	547		6294	25998
			50650	9936	139067			79980	1122	93185	29796	57143	STRATIFIN	83886													100847083	55083		6299	3421
			8603	100526664	84931			60625	23596	93058	7384	90956	suPAR	84957													100873977	9371		6310	8870
			5757	23172	113235			170506	1123	92912	8237	107	SURVIVIN	332													100874011	122773		6314	389792
			5524	7296	960			929	1128	92806	8975	55811	SYNCRIP	10492													100874016	54758		6392	10964
			57092	80895	150160			284716	1135	92703	9736	116	TAB1	10454													100874021	84861		6433	64135
			6451	64968	3456			26063	1141	92691	8078	117	TACI	23495													100874028	10219		6455	3437
			84464	3385	150082			55646	1143	92400	6843	118	TAGLN2	8407													100874037	387264		6502	112752
			4487	51176	654123			55728	9469	92211	7419	119	TAJ	55504													100874107	338651		6513	3598
			9409	4267	81696			54511	4166	92105	55187	120	TAK1	6885													100874188	144811		6517	3603
			9815	226	647141			54033	1149	91966	57617	84435	TEC	90952													100874195	3912		6527	26280
			1778	57198	8403			201780	1154	91875	7443	166647	TEC	114798													100996279	3920		6557	259307
			283377	55049	11026			25937	1158	91544	7447	576	TENASCIN	7148													100996635	9215		6574	196294
			492311	2936	390181			8738	548596	91392	23558	9289	TESTICAN2	9806													100996664	51451		6575	10989
			11275	54461	3579			9922	1159	91050	11193	22859	TFF1	7031													101410545	3938		6583	3613
			94101	29956	79746			10561	22802	91012	84058	84059	TFF3	151887													101669767	753		6642	55705
			5192	80219	7401			7515	5010	90441	84305	128	TGFBRII	: 7048													101926897	10184		6646	134728
			5194	286530	2358			4157	23562	90390	9841	55256	TGF-b-R-III	7049													101927050	375612		6650	284359
			55958	196383	3779			137682	24146	90333	23390	10974	TIE2	7010													101927075	723809		6722	57325
			81671	51816	3596			83787	149461	90324	80108	132	TLR4	23643													101927134	10186		6752	84078
			6016	101929780	25960			4645	9075	90321	84936	133	TMA	55319													101927150	96626		6779	3750
			51088	7086	1244			3397	9080	90102	64145	84890	TNFSF18	8995													101927186	100288695		6787	131096
			57685	10125	284345			56267	348174	89781	7748	134	TNFSRI	7132													101927305	91750		6792	80333
			10460	975	6368			55268	497190	88455	219749	136	TNFSRII	7133													101927358	100133205		6811	115207
			3068	5880	115650			51103	283971	85458	10778	148	TP53	7157													101927359	100129347		6821	51133
			5810	56674	606553			56731	51267	85453	22891	146	TPA	5327													101927374	100499467		6836	8284
			6867	10206	26735			51373	9976	85397	79893	159	TrkA	285704													101927406	400619		6873	154288
			101927465	8536	10880			5126	154790	85315	155054	84830	TRKB	4915													101927459	283867		6882	10112
			8809	92259	126859			64651	26253	85019	79943	165	TrkC	547616													101927487	643837		6883	3801
			93166	10155	91662			1349	1047	84928	7553	101929709	TROPOMYOSIN2														101927489	84894		6885	114792
			7799	7174	124783			148252	1192	84911		60312	Troponin-T	7138													101927494	643414		6916	10324
			2113	79902	337879			64963	25932	84901		4299	TSH	7252													101927686	64788		7008	11133
			2114	55017	7134			1522	9746	84878		27125	TSP4	600957													101927796	222484		7009	3848
			440915	53635	650239			5800	134829	84871		10939	TYK2	7297													101927797	57121		7013	386677
			1755	29108	161514			90634	123920	84869		54812	UFC1	51506													101927829	55227		7023	200634
			55769	440400	283777			51106	1265	84851		340351	UNC5H3	8633													101927849	100130742		7025	112849
			23262	3420	151477			1520	1266	84844		84871	UPA	5328													101927960	57633		7062	144811
			100996654	23585	57096			29086	1302	84798		55109	URB	100124696													101928137	4046		7084	286190
			51313	55340	11009			10120	80781	84765		55750	WFKN2	124857													101928201	4052		7090	342900
			54097	100527949	400709			51319	1277	84668		10554	WIF1	11197													101928272	57128		7094	3972
			5168	5514	317754			8692	57642	84650		10555	WISP1	8840													101928283	100129461		7125	100113403
			5167	6418	1277			951	1282	84618		183	XPNPEP1	7511													101928298	28992		7174	140828
			22875	124583	388701			8722	1286	84547		23287	ZAP70	64581													101928437	4108		7289	730091
			23258	55571	50624			55212	1293	84527		57085															101928441	728269		7290	148231
			7047	5034	5669			28957	256076	84525		25909															101928495	4116		7334	100874275
			7052	54936	10226			91647	1297	84460		191															101928496	84441		7417	645434
			7111	58477	55567			66004	1311	84450		10768															101928516	55534		7422	400043
			6690	1848	79674			2207	7464	84448		23382															101928519	4125		7466	51601
			93380	2534	125963			23107	1356	84343		79026															101928523	4133		7476	4000
			23291	51155	283461			51330	1358	84321		113146															101928622	8491		7482	348801
			29766	9191	5678			140679	27151	84316		64853															101928656	9448		7503	503693
			102	7157	3554			8761	100509894	84294		9131															101928781	256714		7528	10162
			6392	8106	53630			56945	10815	84272		84883															101928820	23162		7555	9926
			6868	6818	2661			29070	10814	84254		204															101928885	220972		7561	9404
			7644	445329	115761			51649	151835	84246		50808															101928887	57787		7565	122769
			91607	100526830	23629			6855	56265	84168		205															101928907	9782		7690	127495
			7305	101929857	496			84968	1378	84132		26289															101928913	84515		7692	347731
			91548	27005	347902			22866	200407	83982		11215															101928961	255231		7741	26065
			145820	10670	3201			54920	1392	83937		9472															101929052	79648		7745	11157
			84270	10491	6850			162282	83716	83860		80709															101929083	90550		7769	4048
			51726	28978	81629			64965	1410	83851		10327															101929120	10873		7786	80741
			8759	4716	85235			284273	1428	83743		231															101929153	9968		7905	4074
			201627	5718	4938			149420	1435	83733		8644															101929428	4205		7916	9500
			5894	9284	388698			7812	1439	83698		8574															101929583	84465		7936	57692
			203100	79829	118932			3815	1440	83440		22977															101954204	1953		8000	63905
			200150	60559	390892			960	1441	81928		10000															102465692	10227		8001	6416
			23279	7534	84830			4921	1464	81894		105378083															102465862	23295		8029	9175
			26525	5236	1052			10413	1466	81875		284930															102465865	79778		8036	23005
			10464	56255	5670			8775	441521	81856		112268124															102466814	54531		8085	10982
			1352	84954	154288			29015	29119	81794		101927620															102467213	100302233		8106	375449
			9909	3738	286122			1413	1504	81617		100288175															102546227	100422990		8111	9656
			55667	7326	2828			1310	1075	81575		100129620															102546299	102466162		8139	4193
			9972	4358	345895			10645	613212	81572		101929243															102606466	100302287		8178	219541
			10717	100616113	152926			2771	2919	81502		101928489															102723356	100313884		8204	9412
			3482	9601	84439			29946	3627	81491		219															102723362	23164		8260	9443
			8822	10460	6364			6256	6373	80823		10840															102723378	117195		8325	55090
			221935	25824	6295			57559	58191	80778		217															102723526	124995		8349	56917
			64792	81619	9423			3292	2920	80746		501															102723661	107987373		8411	84709
			9039	84278	1564			4487	2921	80745		223															102723709	6150		8431	58526
			10054	28517	30014			158787	3576	80345		226															102724874	28957		8438	90007
			100292680	28663	55001			4277	3579	80321		79868															102724913	23255		8443	406902
			7317	28738	58530			1778	80231	80319		285016															103689913	57509		8476	406928
			2257	8683	1828			10361	1535	80243		221120															103689918	23281		8479	406940
			100422872	56616	7805			84926	1583	80196		54784															103695365	283463		8493	406983
			79989	126328	199675			283951	1544	80146		91801															103724386	4586		8502	100423023
			25816	100996517	2638			55365	56603	80142		80216															104266960	89853		8536	100500810
			10824	54838	91156			8644	339761	80014		205147															104355287	4651		8541	100500834
			7127	80351	881			5891	57834	79986		268															104355288	399687		8544	100422930
			114803	28639	313			2572	4051	79969		57463															105369739	4649		8562	100616312
			1241	80301	6278			10687	23500	79929		83607															105370242	8736		8565	100616457
			4001	84247	2315			54475	27071	79869		154796															105374693	23138		8568	100616416
			4066	64864	390152			7422	440097	79863		51421															105374704	138151		8575	100616125
			55289	7386	245973			55958	9201	79858		155185															105375972	51594		8581	100616170
			7546	79720	89885			83737	23564	79827		64682															105376633	100132406		8590	100616371
			760	51398	389690			2281	54541	79819		25847															105378311	728841		8621	100616159
			7545	54890	124220			79000	55601	79780		119504															105379478	400818		8634	100500895
			100506655	5928	3099			5810	91351	79777		51433															105463123	55421		8660	100302186
			768	7167	10232			219285	148252	79720		51434															106480334	135112		8661	100847056
			9595	55080	27299			83483	54769	79692		284																4703		8669	768217
			4603	29920	84332			10449	27185	79668		51129																4756		8674	54069
			8195	102466270	339201			79630	9940	79664		286																81832		8732	4594
			23353	51150	4283			79786	201477	79654		287																4771		8775	116255
			55746	134430	503582			975	9787	79646		288																23114		8800	118812
			23548	57404	283768			55303	127343	79628		150709																84901		8815	196264
			642587	471	124975			55753	63950	79623		162282																4781		8880	29074
			10159	63905	389799			7799	201625	79618		56172																9054		8904	51073
			2115	1535	834			79752	8632	79602		57037																283948		8945	54534
			2117	64978	388021			10964	3337	79589		57763																4810		8992	122704
			23546	3052	151254			5999	1759	79577		55608																51199		9033	128308
			140732	100526693	389840			203197	29947	79567		81573																152519		9070	3396
			2001	1316	987			5328	1793	79414		348840																11188		9158	64963
			10771	476	653145			22875	1794	79269		170961																22871		9168	10240
			54700	1209	256236			4902	80005	79184		23243																57555		9188	151507
			5899	151903	114824			9628	81704	79137		147463																84166		9210	130916
			22978	9128	462			7052	1796	79095		651746																22861		9276	219402
			9173	6845	64098			51435	1803	79078		390616																27231		9342	9108
			1269	162427	10357			3566	55211	79018		375248																23420		9343	4548
			134829	5534	51266			22918	1805	79016		84832																50507		9374	4593
			663	80310	2131			1535	644168	79007		339416																261734		9379	4084
			29102	55824	56128			9607	1824	65979		157567																387129		9397	4628
			64064	101930324	58490			6389	113878	65263		79722																404744		9410	140465
			9267	4065	6527			2669	151636	65078		63982																27020		9451	4646
			151613	3418	51806			9913	1846	64860		196527																29959		9453	58529
			79573	55111	341880			2081	1780	64841		3730																55051		9455	7593
			90246	102466736	84674			90853	1870	64839		81611																8204		9456	10443
			222537	126003	84647			9142	10148	64770		118429																64324		9477	23138
			606	10525	131920			54495	1893	64759		301																221294		9489	4666
			9096	22820	377841			54847	60401	64746		302																123803		9510	10135
			2071	11014	286514			54913	1906	64743		308																4923		9529	8031
			2068	84273	285335			5480	146779	64708		309																91181		9541	4697
			928	2597	374403			10313	2202	64430		310																256646		9578	4708
			2073	23484	2919			148304	80303	64420		8639																4968		9601	4710
			283143	54344	643			7415	1942	64409		55435																390874		9652	4712
			7456	6235	221060			5718	1945	64395		1174																2652		9653	25945
			6521	84079	83893			80823	133584	64282		160																728458		9666	79661
			133482	8933	1066			1653	1978	64222		1175																94101		9673	4802
			84437	22818	8771			6505	1997	64168		8546																114884		9718	79840
			79677	133619	143501			10063	2000	64132		8120																114883		9722	158801
			9126	125150	352909			5664	55531	64110		8943																146183		9726	28511
			8671	8453	171389			778	2006	63979		26985																80227		9733	23530
			10051	5704	3665			1266	6785	63941		10947																101928345		9738	27035
			2004	79004	3038			80124	256364	63934		1176																23569		9741	10360
			2005	54977	115004			254778	2012	63917		10717																5047		9745	4885
			159090	6892	160364			84302	2014	63906		9546																85315		9757	1728
			214	8443	160298			25979	2018	60495		322																25849		9762	203447
			2700	374291	3205			30010	8507	60492		10307																56147		9764	54780
			56964	283349	4547			85415	2026	60491		327																56146		9776	131870
			57178	10156	442186			1537	2028	59353		328																56145		9785	11051
			5646	100271927	403284			50853	956	59350		8539																56144		9792	23165
			2593	9363	3257			3797	1969	59345		8862																56143		9831	79023
			4154	126626	57082			6863	2043	59284		187																56142		9832	54830
			10150	55770	219957			4723	2044	59269		333																56141		9841	11339
			5583	23474	338755			2687	2052	58490		57136																56140		9852	56944
			23225	7378	7008			7022	253152	58473		341																9752		9854	347468
			101929759	932	388818			27255	54869	57799		348																56127		9857	346517
			5580	7554	10312			11065	55914	57798		80830																10336		9868	4998
			54663	79087	7365			140453	9700	57795		79135																9659		9877	94103
			9038	646817	10647			5920	84141	57787		351																5158		9937	114876
			84128	162989	503835			857	132884	57786		10513																57107		9953	26031
			5578	23339	29895			113278	2124	57713		26060																23042		9972	114879
			25852	3074	2206			4478	2139	57693		55198																5251		9984	55644
			84942	6195	157317			22845	2146	57687		100505854																653583		9990	8106
			6336	647979	3669			9636	2152	57649		9716																63895		9994	53354
			7579	10121	27033			3482	11170	57643		116985																8503		10001	55872
			80335	326624	83872			3669	374393	57624		23237																5303		10005	100750225
			57520	56940	400673			64792	79843	57604		372																55124		10011	728606
			3145	100653247	83992			9039	84734	57573		9870																5310		10024	5096
			23072	29933	6708			8560	23359	57571		377																93035		10036	5101
			153443	284367	389558			10681	9413	57570		55738																5315		10039	84759
			401106	27250	342897			26297	286333	57563		84364																84814		10058	5108
			146050	6793	93661			84225	100128385	57561		10564																57125		10061	5111
			51601	1536	80274			79004	10447	57504		57221																25953		10067	64430
			5591	4668	2880			25816	145773	57466		27236																84172		10092	22984
			128025	55671	10538			158800	644815	57462		23647																5442		10096	84306
			8227	27095	387054			132112	157693	57452		94134																9883		10101	10081
			8915	54949	55586			25927	355	57447		55843																23368		10106	5156
			5199	706	5268			57102	129804	57336		93663																10848		10116	5170
			64092	2581	441601			5341	157574	57326		57569																129285		10128	51248
			56980	64098	2525			54984	51725	57214		23092																5523		10137	23481
			10052	5033	8808			26207	26268	57213		109286553																5532		10142	5210
			26258	29107	3932			55176	2207	57192		79822																391003		10144	27315
			23385	5692	3569			29927	2209	57181		57514																63977		10161	1911
			55100	11334	137075			51098	2212	57154		143872																51422		10186	51230
			388552	317649	675			3927	2214	57149		9912																5575		10193	162466
			10402	6482	22925			7546	2215	57142		23526																54496		10196	390940
			158293	152687	27134			10440	2217	57122		394																254427		10200	5319
			64077	5720	9510			7386	84824	57118		395																219731		10227	23207
			80762	64393	9697			25830	400550	57099		398																163154		10236	84513
			84163	4723	284353			50614	55612	57084		9826																55615		10252	5370
			51320	6396	3048			7050	83706	56985		27237																5639		10254	6490
			84058	64224	255239			8195	154860	56975		9181																5670		10262	23649
			80237	79142	5873			6908	221472	56929		115557																10197		10269	5435
			343702	55505	56659			4686	2246	56922		26084																5727		10282	5456
			54093	378	10861			79877	2256	56904		100507524																5747		10300	100861520
			29072	8553	649598			23158	2247	56895		50650																5794		10343	51645
			5916	5018	3426			89797	8074	56890		389337																5799		10362	5521
			694	9267	27159			51022	2254	56884		84904																5858		10381	55012
			1027	11284	6283			9143	53834	56853		55701																169714		10388	9989
			64593	4150	389123			56261	2274	56664		9459																51715		10391	84106
			133383	593	2676			4318	84929	56663		8874																57799		10400	23683
			80854	84085	150379			64219	286467	56662		23229																5867		10425	3276
			11152	7076	54959			1997	60681	56479		1820																55698		10432	5627
			1130	3689	391365			4725	63943	56475		10865																57186		10445	133619
			23160	4149	54900			4724	2318	56271		25820																10267		10450	79057
			433	54440	26692			1117	23767	56260		10425																5905		10460	5686
			54521	754	54810			3665	2321	56255		400																140893		10465	122706
			100505641	84681	2707			6330	2323	56122		23568																146713		10468	5693
			5412	57862	85451			54502	2329	56107		403																10432		10471	5701
			92170	3727	54328			29118	408263	55958		10123																100526737		10473	5716
			7083	7803	434			9961	2353	55915		379																84991		10476	118672
			84993	28956	91937			11258	2354	55906		26225																473		10478	5724
			22884	55055	53407			55616	8061	55884		84100																51455		10489	171558
			149371	23403	2207			9025	286380	55850		10550																91869		10492	5778
			285172	170371	23627			23283	8928	55823		151188																23180		10513	5789
			5915	10945	656			83759	2302	55813		127829																5992		10524	9232
			23452	144203	79755			22978	4303	55810		55207																84220		10539	9933
			7086	408186	652461			6047	2357	55803		55156																729540		10556	150962
			55763	728715	7367			9173	2358	55763		55130																727851		10562	222659
			253769	100509445	10457			9266	9758	55761		93436																6002		10594	79832
			339894	55643	348807			27128	23105	55757		79637																26575		10597	7879
			80232	967	343099			94107	2512	55744		25852																6000		10603	23637
			8615	6747	3601			5019	5348	55728		51566																399		10607	11159
			116496	112936	1846			1428	5349	55714		100131755																58480		10625	729475
			91833	84317	8698			157807	79443	55707		54470																353116		10627	25788
			108	246	57663			55544	11211	55696		339541																246243		10629	5894
			144108	22920	93164			79573	2535	55681		79624																27246		10668	100190938
			113	54813	58503			2139	7855	55659		10552																285498		10690	5929
			9061	23625	4159			6881	2538	55632		81873																57674		10718	64062
			10139	8295	9322			492	9846	55616		10776																9475		10730	54439
			79956	805	171484			6649	23710	55556		85026																6117		10741	5935
			644943	808	2219			54902	2554	55552		57561																6185		10785	9978
			63910	7009	1890			2071	2559	55454		22901																6210		10799	10171
			7398	5589	1814			375484	2561	55352		419																6196		10803	201299
			51327	4942	149830			9715	2563	55349		653308																222967		10807	29803
			84803	51107	6005			6286	2564	55327		8853																728194		10811	5986
			100190986	6723	60675			7431	2566	55321		55616																23168		10827	503569
			80833	55630	22900			81892	2567	55319		79754																6256		10846	6000
			10050	3071	10876			7432	2570	55314		140461																29115		10848	79651
			10605	8851	3315			51699	2571	55303		10973																84324		10849	399
			147746	4704	2591			5270	2572	55294		647219																158297		10850	727940
			100874362	100287497	162333			26094	1647	55285		110599588																22937		10890	23504
			122945	10120	138715			53834	4616	55272		9070																49855		10892	84864
			57498	1431	150094			55827	10912	55262		40																6319		10919	134701
			84333	338620	127069			55905	79690	55255		8623																152579		10921	6018
			57418	440944	91734			4609	55568	55249		440																85477		10954	27289
			3587	4738	8789			2701	8693	55225		54529																256380		10960	51255
			10336	51552	886			10135	2625	55190		444																6386		10973	6045
			359845	56983	154907			1174	2633	55167		253982																9871		10983	55599
			204851	1654	135932			5646	400759	55164		57168																10507		11007	94137
			9627	5537	284656			54778	2634	55152		23245																54437		11010	441212
			101927157	3939	649446			1240	2635	55128		55252																57556		11020	6135
			10114	1979	9287			57617	9245	55127		84896																59343		11034	9349
			28996	3265	8092			7718	2668	55103		29028																57337		11044	6152
			79814	347734	9493			10005	2669	55094		54454																989		11051	6122
			28962	100616124	8048			5579	2670	55093		85300																10801		11054	6133
			4774	79577	283297			5581	2675	55071		466																84193		11065	6229
			101929120	114049	930			55011	728441	55062		1386																23064		11070	6188
			51571	5729				6146	126326	55030		9776																23678		11100	27079
			7342	144404	113730			25852	2696	55022		22863																259230		11127	285367
			100505920	9235	80739			10866	3282154	100505869		118738																22848		8354	60496
			9699	377677	11339			2566	2701	55014		55054																129049		11130	23223
			2250	100507258	256329			9688	2706	54947		55102																9644		11131	345895
			10526	100505666	259240			51143	57369	54934		84971																344558		11137	284654
			120071	93273	127294			23392	84662	54908		9474																92799		11138	340419
			55317	1400	713			3251	2743	54904		79065																23729		11140	8933
			3597	100287227	10942			4043	2744	54862		471																375484		11209	84816
			6416	78998	80221			55893	27165	54851		51062																57606		11212	6262
			5604	9156	1582			81929	144423	54823		25923																8170		11221	23256
			7874	283987	125997			25906	2768	54811		23300																6565		11235	6327
			7171	157693	3710			3075	149775	54808		220202																63027		11252	57001
			253959	400728	259285			4809	55970	54790		84913																387601		11255	9554
			7170	57622	375316			113675	51764	54780		23120																92014		11273	80343
			7375	100130742	414062			56143	2785	54753		57205																28965		11282	23231
			9960	407	11187			871	2787	54737		286410																7780		11316	223117
			55454	101929631	3561			8869	94235	54707		23400																285641		11338	29843
			253430	10184	63928			3162	440295	54675		84239																54020		22794	55209
			1734	101929752	4256			6282	2805	54581		476																92745		22832	79918
			1859	8639	5465			3117	84803	54522		477																51151		22839	83443
			23185	28976	2672			6281	221914	54499		478																57835		22856	253970
			57187	84182	2158			6487	10457	54498		481																9498		22865	6439
			406886	100526825	23566			79792	83550	54487		488																6545		22891	129049
			23592	9880	1082			117247	124274	54476		490																84464		22924	153769
			93273	643529	7431			4772	57512	54453		491																60682		22934	54847
			10933	2318	401428			8061	2840	54433		492																23049		22985	80143
			8468	8552	7135			30845	2845	54407		9914																23293		22987	51804
			2289	8029	150165			64506	2859	54207		498																64750		23053	348235
			25849	100506314	390081			30844	2828	53938		506																8303		23054	25769
			317662	286161	26291			126326	83873	53407		509																92017		23067	83884
			51141	644172	58472			160897	8477	53353		513																387104		23071	253512
			3638	729658	619207			64210	53831	51762		518																114815		23072	54977
			23352	254228	54541			64793	100528062	51747		9556																6670		23089	283130
			23304	284739	3965			5218	114928	51742		522																221178		23092	147407
			197131	283177	440689			3704	9052	51729		539																727905		23102	6518
			23594	57126	161502			10056	63940	51728		537																26165		23112	84912
			51366	10782	389898			12	57822	51710		10159																729597		23116	23516
			7175	5303	163747			2821	2903	51678		535																79794		23130	84102
			11076	101927176	390199			22911	131890	51668		533																10251		23140	9497
			1813	91624	30814			1026	79792	51639		9114																57731		23161	22865
			257358	79772	55124			64129	57000	51634		8992																80725		23165	84189
			136051	8641	84750			694	219409	51633		523																9901		23190	128710
			4170	56102	123688			5265	2995	51622		526																284297		23204	9597
			114883	56103	56138			1213	401022	51617		528																6767		23232	6605
			158431	56104	54145			6729	57817	51614		51382																6482		23247	440087
			103283057	56108	8576			1211	9001	51611		529																6487		23264	55181
			55122	56113	55855			133	404037	51596		51761																81849		23284	644538
			9885	5866	344			9070	768097	51571		10079																23166		23294	201895
			2175	2810	2634			10667	3037	51566		545																55576		23332	284422
			83959	9615	145376			2736	84868	51548		8455																10948		23344	57154
			2178	63898	83887			5104	1839	51497		26033																100505678		23361	26783
			22888	58160	339231			64135	338442	51466		6310																57519		23366	26821
			8867	55356	1418			387521	414778	51447		4287																27067		23371	26808
			1362	26539	93978			114897	3055	51426		56970																256227		23397	692211
			26468	2329	7421			5412	3059	51390		552889																401312		23401	10073
			1200	3046	474382			1466	348980	51379		549																10963		23416	10407
			598	285955	286256			8682	10866	51367		79000																6788		23450	6678
			54991	442590	25770			79600	10870	51363		60370																6814		23479	54558
			1368	729597	143662			10399	3065	51337		558																9515		23505	57405
			54989	100310812	912			348093	3067	51324		51582																64420		23518	144108
			130749	84874	8572			310	85441	51280		113451																23512		23531	5552
			23211	100132354	53836			7078	51191	51272		567																23224		23542	6727
			9703	374920	80231			7076	23493	51251		135152																161176		23546	6729
			25821	101927438	80852			9737	26508	51205		26229																171024		23555	27286
			23224	57801	29128			2010	3083	51192		2583																9066		23567	9295
			116154	1358	222967			8463	3090	51175		2683																6872		23583	6432
			285084	5616	390038			7079	64344	51170		8702																9014		23587	54879
			3842	4584	51411			84253	29923	51166		9331																6879		23594	100128098
			3930	100505715	374768			84868	3092	51122		11041																10010		23621	10948
			284390	85366	222584			1992	28996	51121		105369147																9797		23645	57519
			23534	57096	6510			301	147746	51106		9577																57465		23659	6786
			493753	80237	150135			7167	55355	51096		25825																6938		23660	57620
			1378	100996485	337968			302	3099	51090		100379661																9895		24148	56164
			7626	285286	390323			54997	3106	51082		571																51106		25759	11329
			8243	100462953	8343			25825	3107	51081		573																64216		25790	30968
			105372969	1832	641371			347733	3128	51079		9531																7038		25813	10923
			10882	2267	80350			1280	352962	51073		9530																7046		25839	55578
			5611	79083	81492			134701	3142	51068		7917																7049		25844	9913
			27000	652276	353091			54497	79366	51062		440465																117145		25874	9900
			10106	8862	388533			28231	3162	51030		54971																7067		25880	258010
			80331	147686	283659			3833	3249	51028		10409																79875		25901	25949
			4172	84648	795			3059	100128675	51015		11177																7073		25921	143425
			254251	245972	353514			11336	3251	51002		80127																26517		25930	117143
			84081	1893	3810			123	80270	50999		8424																9375		25940	55080
			1398	9623	642293			5995	159119	50840		55212																56889		25956	50837
			9759	100505547	442184			1839	3303	50813		55973																64114		25957	83940
			1050	2949	4940			10262	3304	50804		723788																255104		25970	23329
			1051	909	140870			116496	3310	50640		8412																55654		25977	93594
			3066	79724	400707			80832	3315	50618		10286																121256		25988	6913
			1053	92591	1535			92691	3339	50509		54828																124446		26000	6926
			3065	101929681	3627			5510	3358	50484		586																55092		26010	51186
			9525	286451	8688			57084	9177	49854		587																9528		26064	7014
			2267	203429	5328			196410	100128264	44449		56647																252839		26074	122046
			1054	653687	57214			2554	84329	44445		100286844																283471		26088	374618
			27183	51267	1800			1031	3383	29929		8915																79931		26135	64216
			10875	5325	390064			55290	3399	29919		53335																51086		26138	55623
			64127	6872	219986			27010	3428	29907		64919																23534		26145	29090
			7273	8349	6337			4168	10437	29888		596																23112		26175	92609
			25831	101927537	442194			2937	3430	29106		598																7148		26189	26520
			55610	100129387	284355			7805	10561	29102		10018																11076		26234	51643
			65988	340085	253512			2828	439996	29097		599																8460		26271	54499
			51542	26093	1339			10383	8519	29094		100529063																7178		26355	23671
			283337	1687	3440			80024	10581	29093		602																93492		26519	338773
			10559	5961	63948			132332	10410	29080		604																7187		26532	114908
			92667	102724094	2658			7581	57722	29063		9275																7109		26586	128218
			23443	221476	7712			9896	10644	28990		53630																60684		26765	100505894
			54498	9308	7161			4774	3485	28987		622																11181		26788	153339
			55911	5205	120793			23529	3489	28977		56898																114088		26807	92703
			9920	2622	170063			80007	255130	28952		8678																9321		26959	84222
			3301	387496	128876			79177	79713	27436		221336																9319		27005	85019
			2123	2634	89822			3304	339834	27349		222389																54802		27030	746
			148203	400410	27288			51734	10320	27304		55859																158234		27037	55161
			51031	284390	157313			64763	8809	27300		84707																162514		27121	79041
			2124	283248	2736			51239	3553	27291		27018																203062		27146	55362
			100652770	196410	219428			7172	3554	27252		56271																441631		27156	157378
			51000	7516	9496			55355	7850	27249		340542																728395		27164	220980
			10915	100505918	4316			11170	9173	27246		168620																84630		27178	25963
			55591	93953	92106			400120	8808	27245		8553																7265		27187	7110
			23613	340533	81623			7108	50615	27236		55909																54902		27244	29765
			221477	314	11200			29902	9235	27163		330																199223		27248	7113
			359	158830	341405			3843	3563	27147		54841																23331		27253	7136
			6197	5196	29946			5500	259307	27132		642																158135		27257	23371
			27330	139629	79019			84617	3566	27125		644																246119		27292	56993
			6196	8727	83854			10914	3569	27069		645																246122		27299	10210
			25859	121355	387680			2887	3570	27020		89927																100101120		27300	26092
			27236	4514	112714			27173	9118	27012		90427																10426		27303	63970
			283933	101929612	391059			115004	22876	27000		649																51030		27304	102723655
			55032	1428	4332			5606	27124	26995		55589																201158		27314	102723713
			100505877	4303	145165			5604	84684	26827		655																100533496		27329	102724101
			91947	84689	654229			3488	26034	26821		168667																10587		27339	102724127
			23524	23769	286530			8078	10335	26809		657																7329		28956	24150
			7866	85453	7041			2149	11213	26808		658																118424		28973	729355
			83548	6348	400499			6890	3659	26791		659																9040		28978	653550
			3475	6349	2249			84321	3665	26790		9790																5412		29062	729264
			55343	414062	139081			8563	3394	26785		54796																22888		29066	7163
			3134	3787	728461			80145	10379	26780		663																100134015		29087	22974
			51340	101927224	55803			126308	3671	26747		664																23352		29107	8717
			10250	80054	131831			782	3678	26575		665																7371		29109	10906
			7074	101241892	9437			148932	3683	26504		91653																7353		29118	11074
			57045	100505478	1058			11031	26548	26468		259282																10497		29123	56658
			8123	732253	342909			9823	3689	26258		118426																7380		29770	81603
			101926996	246126	400555			8567	3690	26256		54928																7390		29781	9321
			162962		11118			55651	3691	26232		673																8615		29796	286144
			100506677		5355			23682	3697	26220		221927																107986084		29850	7253
			51696		50831			79622	3702	26064		25798																7375		29881	85480
			54103		8687			5475	3707	26051		140707																55230		29893	7247
			100049716		8969			2287	3708	26040		1620																55031		29904	26526
			121273		286362			6626	85450	26035		55845																7405		29958	10100
			23363		55805			9162	105372240	26034		25855																10451		29994	9256
			3546		375387			6006	126306	26033		27154																7415		29995	100130890
			23499		5013			8452	23189	26032		84446																81552		30000	7265
			641467		332			130507	163782	26027		9024																26276		30968	148014
			6814		79400			205	3736	26013		684																51231		50484	8458
			7294		26246			112885	3746	26002		84280																7447		50511	9675
			79871		6340			5000	3747	25988		121551																200403		50856	7274
			1395		7157			10531	23704	25983		149478																23335		50865	79183
			8087		55195			221443	80333	25979		22903																84128		51006	246119
			973		7040			63974	3772	25950		55727																23038		51029	10426
			374899		55057			9531	3760	25940		91408																7490		51054	286319
			23256		10954			138151	60598	25925		694																286046		51075	114112
			54921		139170			25	51305	25924		7832																63929		51084	23350
			55745		1413			51296	3784	25917		10950																23039		51104	55236
			23199		2765			51560	56479	25891		11120																9213		51114	7314
			29091		149461			5360	3787	25876		10385																7518		51125	11065
			55082		3452			4170	3788	25830		54718																7455		51141	440288
			117157		401827			64112	27012	25828		11119																26137		51147	26043
			9698		158297			9332	147040	25824		10384																55596		51167	55293
			55809		6756			10385	146212	25796		8945																29801		51170	80329
			6525		257629			1718	126695	25792		80007																463		51174	729852
			26009		55911			65055	3792	25777		53838																57178		51182	65109
			8875		133			1601	9674	24149		83638																7988		51232	7385
			90956		360203			339559	9928	23658		57102																10780		51244	100534592
			389199		402573			604	146909	23639		64897																11179		51249	57478
			6699		8342			9355	124602	23623		56905																151126		51256	25862
			114571		204801			10231	10749	23585		145853																9668		51263	158880
			25909		10343			1017	10112	23580		404550																84627		51302	10090
			9847		222659			26468	3799	23568		388272																27300		51372	27042
			23318		10917			1200	3833	23543		400591																163050		51409	11023
			4222		1562			3376	3815	23521		147339																100293516		51440	7421
			23174		400932			8216	4254	23515		148223																146434		51465	81671
			7993		3904			92749	147700	23508		10438																63934		51475	57191
			10959		494188			54739	28999	23507		708																339500		51479	317701
			23190		9173			149111	131377	23500		10882																170960		51514	51699
			50999		8021			51187	8302	23483		114900																91661		51550	55275
			219654		120406			29097	100528032	23464		715																7554		51573	7444
			143		80896			127700	22914	23463		716																55552		51594	55759
			55437		55821			89927	57082	23446		127703																84133		51616	84128
			2811		341			25821	125113	23398		25912																7791		51633	147179
			7297		6614			2204	353288	23367		79630																26009		51639	55135
			23390		387496			159013	3852	23361		54964																		51645	55884
			79668		140701			7216	144811	23359		148304																349114		51660	56949
			23078		5470			11011	3903	23350		717																101926955		51690	11260
			401261		64745			11117	24141	23349		9854																641298		51720	22803
			84248		282617			65979	7805	23324		145741																642006		51752	403341
			1841		23529			79714	7462	23318		9847																255654		51806	152098
			253832		83955			151636	26524	23316		151254																100101629		53831	158866
			347902		127707			7220	3936	23307		84226																644669		53838	22835
			55035		4151			10314	9079	23293		79074																100132352		54058	23217
			199		391107			167153	55891	23288		130813																101928698		54101	11244
			79863		127623			9196	3958	23286		129852																100533111		54108	64393
			1890		8519			8508	3960	23254		51161																445815		54360	9203
			5516		79680			54935	3965	23239		132200																55057		54512	9204
			53336		389610			162655	654346	23236		375341																101928099		54540	163071
			9338		4160			58190	8549	23234		285382																100132057		54545	7707
			9694		25959			7187	51557	23231		401097																400799		54555	7728
			10630		643165			6102	3973	23230		720																200772		54558	7762
			9766		126204			80331	64077	23213		721																25962		54602	7767
			286184		83666			64282	3976	23208		55286																90011		54619	7772
			6840		57817			10106	11024	23167		201725																401613		54620	7574
			4800		197358			1392	353514	23163		389197																101929634		54621	342909
			4801		219960			6627	10859	23139		728																102800316		54665	55900
			8729		30816			22869	11006	23137		55322																101929717		54676	27309
			54704		440944			1050	3985	23136		285636																389247		54681	7584
			2941		23434			1051	389421	23126		168090																83938		54765	346157
			25797		399744			54741	387486	23101		387263																400927		54806	252884
			2150		126536			7260	284835	23094		221545																9551		54810	57862
			1955		129025			23676	100862680	23089		79034																57020		54814	163059
			126328		56265			3065	400123	23076		541565																100505996		54826	90594
			100287902		254973			7306	646982	23023		414919																349196		54827	115560
			4705		51338			5162	101101773	23016		759																100506443		54853	339327
			159989		56606			150465	196872	23015		56934																23517		54865	374900
			267012		81050			25911	554279	22986		771																100506016		54874	148266
			55619		51297			64788	285286	22983		762																440253		54876	84765
			139818		348645			3337	400932	22944		767																146795		54882	147948
			168667		8857			54876	100271702	22913		51719																101928710		54891	90317
			375341		1117			25831	100506810	22903		81617																10665		54899	65251
			8790		256892			28990	104472717	22873		219621																340533		54905	26149
			441461		10863			22885	254099	22870		23523																57482		54928	7553
			64434		8749			5431	100506795	22852		81928																11039		54931	7562
			3981		7076			114569	101928420	22850		9478																550112		54965	170960
			221806		347527			84164	100506791	22849		11094																101928595		55000	58492
			150383		150771			8936	202299	22827		57685																101928233		55002	163131
			97		1959			22829	10141	22808		8913																348249		55006	90576
			26133		8022			285	9388	22800		781																101929095		55037	55778
			100996549		199221			79102	9516	11316		9254																645037		55083	7644
			23384		653285			23259	167410	11273		55799																100533970		55105	84133
			91663		122042			2475	4000	11264		782																23506		55113	9753
			652995		2692			10111	1902	11249		785																100505635		55119	151112
			221442		2203			2743	57121	11243		10369																102800317		55127	140831
			9276		1538			22931	9227	11214		10368																100190986		55139	158586
			79670		3263			4733	116844	11212		59284																401233		55153
			79807		3397			11311	26020	11196		59283																388387		55171	3262
			84240		6011			5213	4036	11190		23705																285033		55191	283922
			4023		212			10410	126364	11186		253559																440352		55225	401127
			84460		115727			51000	81543	11159		57863																101154687		55233	55199
			64405		23765			55229	2615	11158		199731																64428		55246	317772
			55617		151903			8519	9884	11157		8618																100526836		55254	9812
			60437		2766			5021	220416	11151		93664																257044		55276	100130700
			91694		4025			10581	100130742	11146		100526820																100129387		55277	341056
			10724		353324			112858	654429	11138		10241																100873065		55280	100533111
			10898		643847			10758	7940	11133		800																102723439		55284	2058
			197259		85441			23760	4049	11124		801																619343		55298	645166
			4841		128408			5306	4052	11123		805																9577		55326	100499484
			9931		119772			868	4055	11120		808																100526740		55327	643387
			1729		54209			84168	4057	11104		57118																102723753		55351	255411
			5827		9121			84306	9450	11044		57172																100996325		55422	440600
			11264		144203			27247	285780	11043		815																728989		55435	8969
			642		442444			4860	4066	10970		816																2577		55526	58986
			2261		1282			6223	23764	10960		818																414351		55532	100874150
			147429		403277			23623	57692	10959		814																9103		55572	100313769
			2263		1003			2495	84061	10955		84254																100271835		55585	80017
			54993		84941			25859	114569	10951		10645																55016		55617	100506025
			284312		653062			11143	158056	10904		157922																374986		55619	654342
			26086		2303			6662	84441	10885		23271																283129		55625	54936
			2740		503645			22920	54627	10873		23261																654466		55628	8331
			114932		1154			567	4214	10838		23125																2021-09-22		55640	125144
			7067		344018			6659	9448	10799		55832																		55644	84833
			54529		6876			8277	256714	10795		23066																		55701	340061
			30061		3938			121053	9261	10782		10486																		55702	100528016
			595101		548313			8992	4142	10776		822																		55709	286102
			8418		375307			388662	5648	10752		823																		55727	90416
			114827		196527			3431	4147	10745		11132																		55803	23033
			256471		5680			6556	55796	10716		92291																		55823	387316
			100507351		3101			27106	154141	10715		6650																		55839	101410535
			54842		4057			55117	4155	10713		824																		55846	692227
			9843		56923			3475	4168	10645		23473																		55847	100533184
			80059		1197			6540	84539	10622		826																		55860	10329
			28989		219968			51703	4170	10608		832																		55863	100132781
			64747		388364			23281	574406	10591		79092																		55900	441490
			11073		3082			9382	4188	10523		23589																		55905	26583
			4842		441178			3105	4190	10499		55604																		55937	58516
			10179		114836			51023	100271849	10466		146206																		56121	222901
			10180		728358			84814	4207	10447		90668																		56135	401106
			100287482		129607			8821	196410	10446		57571																		56158	653479
			285315		348035			403313	92312	10443		79587																		56180	90809
			9943		57057			64409	4242	10438		64921																		56479	79670
			1633		85317			256536	4257	10412		57524																		56655	100874222
			5934		388955			1295	8190	10409		834																		56659	100101266
			220		256144			9398	100507436	10383		837																		56673	100130275
			200373		1621			5217	84953	10371		839																		56729	100113402
			9135		7441			56271	9645	10367		840																		56882	100288842
			9873		84666			64168	4277	10314		57091																		56884	94158
			216		5540			10069	284021	10260		847																		56888	286140
			84335		2683			55859	645355	10254		857																		56895	439
			4049		146722			4259	100616196	10220		858																		56902	642938
			64080		655			5136	4288	10210		865																		56910	100506844
			480		140894			10148	2872	10189		867																		56937	8357
			476		401072			4257	197259	10178		147381																		56943	100505989
			79627		54587			51527	10962	10168		140689																		56978	100130451
			50940		5251			6781	79258	10160		55871																		56983	619498
			56000		27121			55208	4323	10159		11335																		56993	10724
			219		400258			5493	4327	10154		23492																		57048	23574
			157697		389903			974	4313	10144		200014																		57057	400508
			22856		7675			85441	118856	10087		57545																		57082	9692
			26750		128646			3632	4318	10006		57805																		57128	352887
			23196		3770			10131	22915	9968		147372																		57157	730152
			2635		142685			5799	64112	9960		92922																		57171	148534
			4588		646600			1837	4336	9956		29903																		57178	728989
			7913		653742			4616	4340	9951		153733																		57192	8294
			6198		390321			53335	80168	9939		29070																		57205	401282
			57095		6369			83852	758	9920		84317																		57215	8364
			55683		5458			9111	10205	9883		90060																		57325
			344905		4990			36	84689	9871		115098																		57343
			79572		83552			64761	51338	9855		90693																		57446
			94104		653423			51764	64231	9849		64753																		57460
			9372		4778			10912	58475	9817		84865																		57461
			25775		8337			84875	10232	9794		645811																		57466
			3988		399474			57097	4478	9785		203238																		57496
			192683		7033			81691	4481	9778		56936																		57513
			57580		119682			64098	4487	9750		343099																		57528
			114294		2642			57143	4489	9727		387856																		57554
			25770		5427			8880	4500	9711		55088																		57558
			84959		6469			10874	4499	9710		728586																		57567
			134429		51136			54462	4501	9709		55246																		57574
			147323		284338			10921	4502	9705		91057																		57591
			30836		8349			23023	10797	9695		55036																		57599
			26246		283111			400073	100463488	9670		57003																		57610
			6037		374955			51293	100462981	9668		79714																		57616
			9522		51512			340542	100463285	9655		84660																		57650
			26130		2737			114571	100463486	9649		124093																		57658
			6036		23520			7153	222166	9628		83987																		57661
			27436		51213			80781	4582	9617		60494																		57662
			116362		55784			126969	9961	9588		11007																		57665
			9765		283365			29789	255275	9575		283234																		57673
			5575		336			3045	4605	9557		60492																		57688
			5573		6696			100187828	4609	9510		885																		57690
			1571		2210			27339	4615	9495		887																		57711
			23569		119692			3094	4634	9482		83605																		57713
			8545		54848			549	91807	9475		890																		57732
			25791		2535			84996	80022	9470		900																		57798
			29943		81327			152007	4542	9465		10983																		57801
			8776		163720			2867	64005	9415		8812																		57829
			8897		246213			26287	26509	9397		2826																		58499
			9955		8477			9868	8736	9325		54462																		58506
			387119		10437			54496	91977	9283		10574																		58509
			2358		8324			1908	4661	9255		135228																		59286
			8086		9214			10038	4671	9246		929																		59336
			4063		136895			55342	4674	9238		977																		59338
			201562		2323			11118	266812	9205		9332																		59342
			9107		51716			132014	63908	9203		8763																		60313
			401494		64231			389	256236	9140		4345																		60386
			6528		660			7283	83988	9087		29126																		60488
			10808		401262			9363	653361	9043		23607																		63876
			246705		272			4830	654816	9039		11314																		63892
			26497		90853			23765	4688	8971		9936																		63894
			4513		6372			3055	4689	8911		51293																		63895
			4512		118788			7358	3071	8886		920																		63901
			378828		56667			60493	374383	8874		958																		63929
			22993		164153			90050	54820	8862		960																		63935
			8706		245938			22919	10397	8850		961																		63946
			401233		1144			7100	57446	8834		965																		64062
			987		3239			84954	283131	8818		966																		64081
			10613		81788			9686	4744	8814		967																		64097
			2905		10333			713	4741	8799		971																		64105
			4069		124872			54863	140609	8775		975																		64110
			1277		7069			5734	4745	8739		22918																		64111
			23064		79849			28986	10763	8733		4267																		64130
			1559		340529			6574	63974	8707		83692																		64145
			8028		390151			10270	374987	8706		401577																		64216
			101927125		84689			2537	150372	8667		81602																		64342
			442194		8335			7454	4772	8649		146059																		64417
			221241		7113			80896	4773	8648		8872																		64423
			27035		3589			22906	4778	8636		8556																		64426
			401264		1233			353514	4791	8621		8555																		64430
			378		3034			1890	25791	8609		993																		64711
			90678		79056			9764	4804	8602		996																		64718
			3074		3885			158931	4811	8562		51362																		64801
			8411		7366			133584	254128	8527		998																		64864
			3551		114044			9338	128414	8507		23580																		65008
			25836		55365			64863	4821	8464		56990																		65243
			55198		2877			165679	84166	8460		8317																		65249
			121457		2209			6907	91662	8448		113130																		65260
			149840		317701			51451	171389	8395		1010																		65983
			284756		3543			2563	8382	8359		28316																		78986
			285638		26140			64897	9111	8323		64405																		79019
			25943		8399			9019	23057	8313		1006																		79027
			60481		79295			10205	56923	8270		54825																		79053
			54888		649159			771	64127	8193		222256																		79072
			2153		10385			10669	23420	8175		29965																		79073
			23410		23166			6840	4843	8161		51755																		79090
			2155		253017			9518	266743	8125		5218																		79145
			10602		6781			54855	2832	8028		5128																		79171
			56		995			55603	29881	7994		8099																		79577
			5375		2694			10184	10577	7832		1019																		79583
			26780		3394			127435	101059953	7775		1020																		79586
			2030		6865			11006	728741	7772		8941																		79587
			55507		439915			10538	80896	7753		54901																		79607
			57453		161753			321	27020	7738		8999																		79612
			1738		24			6494	4885	7732		6792																		79618
			382		4321			714	1728	7699		1026																		79628
			6041		138307			8547	190	7693		91368																		79634
			27067		1359			114805	56675	7690		1031																		79637
			9400		3043			85450	11270	7638		1032																		79646
			283481		768			55967	51299	7637		1039																		79654
			1756		79689			127845	27065	7586		1040																		79667
			114788		135458			84888	9423	7559		8760																		79696
			114784		27178			10519	81788	7551		1051																		79728
			5378		1978			51742	91181	7539		1052																		79738
			132884		11148			9804	26471	7538		100505876																		79759
			64805		2204			79145	64359	7536		9620																		79783
			6774		146723			8334	4939	7469		1952																		79797
			54815		3446			93664	440836	7405		51286																		79810
			25809		644792			374986	118427	7384		65996																		79813
			26135		346			3082	116448	7378		1060																		79833
			51271		140732			311	390874	7329		91687																		79842
			51020		339168			10597	126014	7325		79172																		79848
			905		7439			65996	29948	7316		201134																		79897
			51306		3581			9601	5008	7301		22995																		79902
			51619		6436			4610	9180	7264		9859																		79913
			7323		54751			57190	101926904	7248		283638																		79940
			7321		6779			84140	347741	7227		123811																		79990
			8859		3948			1284	27199	7216		80254																		80006
			55806		89869			1282	55074	7189		23177																		80020
			374659		239			285382	5021	7167		80321																		80072
			101928134		11081			285613	5027	7164		387119																		80174
			376412		23491			23479	5033	7162		84902																		80185
			153328		81035			3017	80336	7138		90799																		80196
			6793		170572			9619	400961	7122		79598																		80218
			27306		81285			523	5058	7111		51148																		80219
			6794		286183			129804	23022	7074		64781																		80254
			9120		91807			3422	56903	7037		253782																		80306
			284427		871			1137	493913	6942		10087																		80319
			55972		254240			728	79957	6936		23491																		80736
			3840		130075			113878	56288	6908		1070																		80737
			3111		254956			9478	25849	6900		257177																		80742
			3112		116534			10814	54625	6867		29105																		80789
			91120		8862			4026	143	6853		112942																		80895
			1358		90019			677	83666	6821		80217																		81328
			8899		653282			80757	25859	6786		286464																		81501
			50943		120586			1947	64098	6741		220136																		81545
			387751		401565			57569	197135	6726		118491																		81555
			4094		10288			85477	5076	6640		1675																		81577
			92014		85477			91039	5081	6619		3075																		81603
			7402		83894			5420	100505495	6604		3426																		81688
			1823		597			64405	65217	6586		1072																		81889
			3837		57369			255758	56134	6566		8837																		83445
			8439		10255			79955	26577	6565		115004																		83544
			1825		26083			84080	5121	6547		10669																		83638
			5208		286380			131118	654790	6546		10668																		83699
			84153		6507			23492	5122	6472		10036																		83707
			1361		728			197259	5046	6455		283489																		83787
			146227		712			388341	50940	6447		131474																		83872
			4150		79861			3418	80310	6415		1105																		83889
			27347		4109			79058	5156	6339		1106																		83903
			169792		64127			55764	5157	6328		80205																		83983
			51315		10002			6903	5166	6319		55349																		84068
			11329		400359			56521	9124	6307		11200																		84080
			4155		283422			29103	8572	6304		1113																		84083
			9306		390243			53353	54704	6303		1114																		84125
			79788		9038			51004	10630	6272		1116																		84128
			144348		85569			202052	10158	6271		53344																		84216
			23195		128239			345557	246330	6230		10752																		84239
			1810		4161			257106	5228	6228		1121																		84251
			1669		6474			2668	80162	6224		27243																		84283
			8795		5645			25805	112885	6208		51652																		84301
			1112		53354			55054	23187	6206		128866																		84318
			3344		79782			6905	221476	6202		51510																		84326
			7024		2916			126823	9780	6194		91782																		84328
			51765		200931			126393	118788	6189		1123																		84436
			10426		5360			54529	23533	6188		26973																		84447
			79027		284904			65124	8395	6183		11261																		84464
			22834		51327			55199	644139	6161		56994																		84466
			56890		58515			1996	8502	6147		91851																		84529
			29954		2306			3315	51365	6137		1128																		84530
			26002		1041			518	51316	6132		1131																		84547
			10658		441233			6518	5329	6129		1132																		84560
			10659		139212			8531	79887	6093		1133																		84627
			387082		54221			8638	345557	6086		1135																		84643
			5293		43847			23593	5341	6085		1141																		84658
			4033		5619			54842	57664	6084		1142																		84687
			55388		715			54969	144100	6050		101927027																		84717
			9457		7166			347731	58473	6045		50515																		84812
			5291		127557			837	64857	6029		9435																		84816
			5294		51237			834	153478	6017		9469																		84833
			51069		221091			3006	5346	6002		56548																		84844
			4151		147111			5428	123	5999		22856																		84869
			29940		3134			5552	10226	5996		9391																		84872
			84146		2208			10102	126520	5985		51647																		84895
			4200		222487			55530	5352	5981		57019																		84900
			80208		26749			57118	8985	5936		10518																		84902
			2018		401387			79651	5355	5934		1149																		84914
			4659		400935			139221	196051	5905		51550																		84930
			84815		56918			5329	5359	5878		9541																		84948
			5886		951			515	57088	5876		1153																		84951
			5887		3233			84892	83483	5865		55847																		84954
			4864		6701			26052	5365	5859		493856																		84971
			10577		51330			1325	6490	5837		10370																		84978
			60386		126259			9873	10687	5822		9793																		84993
			27332		389151			23022	29944	5782		1152																		85013
			11141		6492			92370	84968	5757		548596																		85025
			100129482		219453			4627	4860	5728		1159																		85313
			5289		149685			3029	127435	5704		23122																		85443
			1830		390667			9331	29774	5636		122616																		89876
			55814		644613			5939	10631	5596		1182																		90271
			27090		56649			79042	5450	5580		1183																		90353
			85445		284359			7748	5457	5578		1185																		90410
			84919		400629			64359	5473	5569		9071																		90441
			221937		79170			7035	5493	5565		9976																		90580
			51144		653399			7057	147699	5552		154790																		90843
			51170		84885			10140	10848	5523		1192																		90990
			51136		8328			85465	170954	5502		7461																		91289
			11104		124599			64777	145376	5501		1198																		91442
			55664		83998			221294	79660	5493		57396																		91833
			101928616		692094			5601	28227	5469		79827																		91949
			14		81025			22856	84106	5433		1203																		91978
			253639		55723			127254	144165	5428		81570																		92017
			29957		440699			1903	4007	5414		10845																		92070
			645191		56000			2634	145270	5387		22883																		92181
			23269		136991			55324	5575	5375		9746																		92595
			22887		401993			2633	5581	5364		1211																		92597
			1723		8740			6622	5613	5332		1212																		92659
			54861		968			4978	56341	5315		1213																		92691
			253512		6280			112616	60675	5311		1191																		92797
			100885781		89944			4846	219731	5287		100132341																		92799
			81856		130749			203190	414235	5281		157807																		94026
			54866		164284			1820	100874032	5279		134829																		96459
			9926		201175			266812	5396	5255		55907																		112476
			8634		256076			93082	51450	5253		56942																		112479
			79701		440307			10263	10279	5245		84319																		112495
			64429		2865			5150	5646	5230		123920																		112609
			9648		2543				646960	5165		54918																		112755
			79571		147183				5670	5162		23070																		112812
			10101		122945				5696	5126		84735																		112950
			9623		10724				100507463	5110		22866																		113115
			205327		91355				5724	5099		11061																		113402
			26973		150677				5725	5098		1265																		113457
			170960		579				9317	5095		1266																		114294
			124411		3486				5731	5092		26507																		114609
			57018		219482				5734	5082		57472																		114781
			53918		629				5753	5071		1267																		114822
			142680		284379				5777	5063		25927																		114823
			953		11314				5788	5058		163882																		114885
			9169		26338				5803	5033		54875																		115560
			9583		85289				754	4983		6900																		116064
			55145		83706				5816	4976		8506																		116092
			8443		392307				221749	4968		26047																		116115
			100852409		5967				137902	4952		85445																		116143
			168451		1014				5829	4942		65260																		116179
			4284		115653				5836	4878		9382																		116236
			80764		9056				5872	4856		10466																		116254
			79725		284739				55647	4841		8161																		116840
			7552		1053				5874	4815		7373																		116937
			2041		1832				326624	4809		80781																		116938
			25963		5075				115827	4794		1310																		117157
			30849		4308				115273	4761		1277																		118487
			754		2668				5880	4719		255631																		118932
			5295		126326				26064	4713		84570																		118980
			23168		143188				91149	4712		136227																		119392
			51465		64902				64926	4694		1282																		119710
			23533		8513				51285	4677		1284																		120379
			417		64184				9770	4616		1287																		121006
			51107		285025				84839	4580		1294																		121457
			8723		148113				54715	4572		1295																		121643
			6642		280655				54502	4556		1298																		122060
			7562		139420				100128750	4537		1299																		122509
			83464		344191				10231	4534		79709																		122525
			51123		124590				283248	4513		23127																		122704
			56919		79850				157506	4509		28991																		123775
			51520		219875				101926926	4306		29099																		123803
			57060		166824				285613	4302		1312																		124056
			5093		553128				5649	4301		118881																		124460
			57708		6539				5978	4298		1314																		124773
			170506		222894				5979	4297		22820																		124790
			54808		154064				5992	4285		8533																		124936
			55762		3743				57139	4259		51138																		125144
			90592		8712				5996	4254		10987																		126003
			51375		165545				5999	4216		10980																		126133
			58486		7364				79651	4190		50813																		126298
			55728		128346				121268	4170		10920																		127544
			9889		3898				22836	4135		51226																		127623
			130162		4665				29984	4129		51805																		128061
			26056		84002				85415	4097		10229																		128486
			25937		403314				158787	4087		56997																		128864
			144110		9052				284716	4086		10699																		128866
			65123		8608				9783	4077		7464																		128954
			57508		391194				11035	4054		10391																		130502
			57553		56624				6014	4048		23406																		130888
			100379174		126370				79845	4033		10063																		131076
			29992		441933				401934	3992		90639																		131474
			259285		1237				6094	3945		1327																		131566
			23063		440093				6098	3925		9377																		131831
			22938		339896				22895	3915		1329																		132241
			55758		154386				6123	3843		1345																		133558
			55656		140690				79897	3787		1346																		134353
			23186		2173				6241	3776		1347																		134430
			100189589		1369				340419	3775		9167																		135112
			23307		8807				6252	3766		1349																		135152
			90693		1572				65078	3749		1356																		135458
			223075		3018				285180	3725		1363																		135927
			8976		57101				100506403	3671		64506																		136647
			25884		176				861	3655		22849																		136853
			26574		8170				6262	3646		10815																		139322
			91851		197196				6271	3635		10814																		139538
			4295		5054				6281	3595		8895																		140258
			54760		63924				6282	3475		131034																		140597
			1665		2299				140576	3422		151835																		140707
			5980		7634				6273	3418		1371																		140711
			35		728062				6274	3337		55313																		143502
			8648		151649				6279	3312		10404																		143689
			27034		9671				6280	3304		53981																		143879
			10499		56112				1903	3303		51692																		144097
			83930		53632				286223	3176		1374																		144577
			23054		10930				6295	3164		126129																		145216
			23412		135886				27164	3157		1376																		145581
			7462		390154				57167	3156		54504																		145773
			7812		147808				148398	3151		23418																		146050
			645591		1668				219285	3141		148327																		146845
			403323		6241				388813	3123		200407																		146857
			91966		378807				64092	3096		1390																		146909
			140850		27181				100316904	3066		1392																		147323
			55127		392395				54440	3065		1393																		147837
			4739		11117				340562	3006		1398																		148189
			541578		158506				22904	2976		1400																		148268
			10424		440590				6447	2967		55118																		148479
			29950		2357				85477	2962		1428																		149018
			10134		2264				6324	2941		1431																		149095
			4869		10840				6326	2905		7812																		149466
			647979		50945				6327	2901		1434																		149685
			4340		680				6330	2900		1435																		149699
			78992		7153				6334	2899		1439																		150353
			400830		2810				83482	2893		64478																		150379
			11012		219417				85508	2891		1452																		150381
			4342		152405				195814	2889		1464																		150737
			9473		11326				10993	2873		81566																		152217
			900		339403				284904	2868		80034																		152641
			23435		169693				6398	2845		1466																		152789
			6457		54084				6401	2776		1476																		153222
			83483		89				6402	2752		1488																		153733
			79786		202915				347735	2686		1486																		153770
			1371		11202				5265	2673		10664																		154881
			54838		6512				12	2657		10106																		155435
			4353		116729				5104	2595		10217																		157638
			10753		944				1992	2563		1491																		157657
			595		79310				5054	2558		9811																		157739
			23473		567				5345	2539		56259																		158358
			400451		26290				871	2353		1503																		158427
			90527		6367				5274	2346		1075																		158521
			824		27136				56256	2224		8722																		160065
			101927609		9027				26470	2222		1512																		160419
			100505498		147199				2810	2194		83992																		160760
			101928937		6506				375035	2181		613212																		160857
			6455		347365				6442	2172		8029																		161742
			5156		1356				6446	2171		79004																		161829
			164045		390260				166929	2170		8454																		162962
			1536		128853				400745	2140		8453																		162989
			898		7408				646892	2135		8451																		163049
			137392		56604				6456	2079		8065																		163081
			284992		11072				54436	2072		51596																		163688
			6253		3562				440829	2071		50624																		163778
			84865		79173				6473	2065		51503																		163786
			6252		27201				57698	2048		6376																		164118
			4881		441911				6614	2035		1524																		165721
			57639		113179				89790	2029		58191																		168975
			1103		8277				100049587	2002		6374																		170691
			57447		400892				27036	1998		101929468																		171423
			57142		284340				27180	1994		51523																		171425
			10682		861				6494	1944		63932																		192286
			1620		51289				147912	1915		1534																		196074
			6866		9970				6503	1880		51700																		196513
			285025		196410				201780	1869		79901																		197196
			10985		440867				345274	1861		1537																		197320
			85446		83755				6556	1848		26999																		199720
			3159		8714				6559	1843		114757																		199746
			4478		10316				6563	1836		50626																		200197
			143903		79919				6564	1822		1583																		200765
			79776		3162				51296	1774		56603																		201163
			1373		6279				9123	1738		1558																		201456
			80148		165				23539	1717		1551																		201595
			3703		3484				220963	1653		57834																		201965
			257397		219981				57084	1649		285440																		202051
			54205		653703				6572	1639		260293																		205564
			283592		162517				6510	1635		81553																		219409
			23118		4998				6512	1496		51571																		220416
			201595		613209				55867	1459		84418																		220906
			149986		26539				5003	1454		9266																		221044
			54439		160777				151295	1428		27128																		221060
			58517		51226				1836	1388		168002																		221092
			64062		80774				6518	1362		1603																		221424
			3148		51149				83650	1353		747																		221504
			11168		153020				153201	1352		57291																		222223
			1108		114336				283375	1349		1622																		222484
			3146		127540				29015	1267		79007																		222659
			1106		171483				126969	1213		440097																		245812
			55585		3136				57864	1195		25853																		253143
			27020		91181				6521	1183		54876																		253430
			9208		64100				57282	1182		285429																		253943
			7532		146850				123264	1152		55827																		254128
			7533		3045				113278	1141		50717																		254158
			9953		55909				11254	1124		1630																		254251
			84135		10				55117	1072		341019																		254531
			125113		390063				6534	1032		51473																		254863
			84991		26716				6542	1026		8642																		254956
			146845		2504				9056	1020		9201																		255187
			51218		6580				285195	1019		64421																		255809
			92400		9180				6579	1016		1639																		255967
			6990		221191				28231	994		100189589																		256979
			84836		337963				100127888	950		10540																		257062
			23158		170393				6590	902		10671																		257068
			5189		3578				4091	871		55208																		266629
			56261		164127				6608	869		23142																		266971
			4318		3690				64093	865		51181																		267017
			7534		130560				23676	842		23576																		283050
			5191		339779				6525	814		23564																		283297
			6421		4994				56950	808		80821																		283489
			3659		125				6615	805		23259																		283537
			54825		6101				8773	801		54541																		283578
			5830		51312				6616	747		4921																		283748
			100294720		28231				6620	710		1653																		283856
			149465		139422				6623	627		57062																		283867
			339745		135892				124460	533		11325																		283899
			4597		8811				8651	529		23586																		283933
			54502		3651				9021	515		55601																		283951
			9961		151648				50964	498		91351																		284161
			3909		23436				65124	490		1666																		284184
			3156		3833				347454	473		79958																		284186
			27032		3127				6663	440		27147																		284273
			79101		503632				6664	429		6764																		284306
			153562		283120				6657	384		163259																		284370
			80351		1945				6659	369		79961																		284402
			9790		195828				55553	331		55667																		284403
			9015		340075				6662	327		414918																		284656
			57821		10871				6672	322		8562																		285268
			1113		9415				3431	320		9681																		285381
			9584		27202				353324	309		64798																		285492
			84779		55237				221178	291		51009																		285600
			493		147746				8877	271		91319																		285676
			492		79981				6688	249		51029																		285877
			490		285596				90853	230		9993																		286016
			126298		27287				6696	216		9162																		286205
			64083		9902				165679	175		8525																		338599
			154743		9332				57522	120		80017																		339201
			112942		56156				5552	112		1718																		339451
			22985		6705				6725	98		79947																		339834
			6879		138881				100131089	92		1723																		340094
			283742		4496				8406	91		1725																		340286
			79612		2359				27286	40		9249																		340544
			441666		5506				146336	39		25979																		341019
			7431		56999				6768	20		207063																		341277
			54504		89777				338069			55526																		341883
			6874		9518				23166			22907																		342892
			6872		140258				342667			9704																		342909
			26298		114026				100505678			60625																		344905
			9794		149499				6775			170506																		344967
			342035		2637				6781			90957																		345557
			9730		2503				202374			81624																		346389
			11245		4117				11075			1733																		348110
			4609		219990				2040			388650																		353132
			1545		84073				85439			138311																		359948
			23294		10214				412			148252																		360023
			54778		503618				8676			54769																		360155
			101929410		6286				6812			84976																		360200
			729658		158724				6813			57540																		374395
			5469		128312				252983			27123																		374618
			26118		5104				9515			1737																		374654
			285148		6564				8801			1738																		374879
			387921		122748				25830			9940																		374900
			57560		84935				387082			1739																		386617
			79974		399693				9900			1741																		387914
			54941		11172				9899			1742																		388536
			100129195		94122				22987			9229																		388564
			55534		115861				85360			9228																		388567
			55298		3214				161176			65989																		388588
			23327		255231				6855			1745																		388611
			57606		127670				6857			90871																		388759
			2734		6556				91683			1760																		388965
			100507257		6554				57586			2039																		389320
			10935		164668				127833			1657																		389337
			7001		162514				6860			23312																		389432
			126382		10736				94121			196385																		390148
			8321		51557				6869			8701																		390197
			5128		114131				8407			146754																		390201
			56169		341799				441864			79819																		390617
			7976		125958				6913			10294																		390811
			3727		303				9095			3337																		390940
			56902		4101				6911			64215																		391723
			127602		132612				83439			54431																		399664
			23215		142689				10312			55735																		400087
			162515		57016				200132			85406																		400569
			5036		401286				343521			23341																		400713
			51359		140881				91646			202052																		400891
			9588		134083				7005			27000																		400931
			79152		4622				7004			134218																		401027
			6533		5284				7011			120526																		401115
			7844		684				9840			51277																		401647
			6536		3880				56155			729723																		402055
			11318		910				7040			54943																		402160
			5368		80086				7041			5611																		403315
			8621		151449				7043			100289274																		404734
			132864		5552				7050			80331																		406882
			100506791		392465				7052			285126																		406930
			5127		10628				343641			9829																		406955
			643160		644314				7056			22826																		406958
			51531		81501				7057			7802																		406965
			2736		63978				51298			1773																		406966
			284611		644168				387357			1775																		407000
			9737		386724				7076			1777																		407045
			66035		405754				7079			1759																		414152
			134288		338675				25976			10059																		414245
			165918		57664				27134			26052																		414760
			64231		374355				7083			23268																		414778
			53820		390110				727910			1786																		439996
			23236		54905				7097			1789																		440081
			152687		257062				7100			23549																		440335
			84622		257236				51284			1795																		440590
			427		643516				51311			9732																		440699
			101928230		6007				4071			57572																		440799
			55137		390067				64114			85440																		440854
			55858		728096				117531			83475																		441108
			6744		80867				11322			1796																		442247
			84282		9124				147138			79930																		442266
			389715		7152				55273			23033																		442319
			64418		8352				284114			9980																		442425
			51444		147920				113277			8193																		442720
			1124		3123				284417			1802																		442890
			644714		7538				132332			57628																		442891
			79998		4607				80008			1804																		442908
			64342		219431				55365			54878																		493900
			1122		1674				28959			283417																		493901
			84914		4653				55026			349152																		494513
			55819		134997				348013			147991																		541565
			22900		6689				162461			1809																		550112
			7805		4005				57413			56896																		553115
			148014		2524				7113			145837																		554214
			23057		649946				64699			55332																		574040
			10128		56106				80975			4733																		574505
			55959		4489				164656			1821																		594837
			9896						3371			1824																		606500
			81847						7128			29940																		613227
			153830						8797			79980																		619565
			23071						8795			11034																		641648
			284996						8794			92675																		643160
			51146						8793			1837																		643355
			353189						4982			56986																		643382
			10006						51330			113878																		644649
			389541						23495			196403																		645683
			50862						7132			151636																		646383
			115330						7133			23220																		646625
			51239						8771			1841																		653677
			148268						943			115253422																		653784
			1441						10673			11221																		654320
			79586						8740			11266																		654321
			375248						9966			54935																		664617
			2979						944			1845																		677792
			8660						7153			1846																		677830
			284207						54863			1848																		677839
			25897						7157			503639																		692058
			28992						58476			1778																		692148
			4683						7161			1780																		692199
			84445						7162			51143																		693132
			9168						286016			51626																		693169
			11178						284355			83658																		693175
			25957						25823			6993																		693177
			22838						7185			1859																		693202
			6564						10345			8444																		727910
			54851						54210			22873																		727936
			91526						54209			199221																		728463
			6891						340205			1869																		728485
			101929592						29953			1875																		728505
			10193						4591			55840																		728752
			80039						202658			10969																		728927
			7461						91107			84650																		729082
			6249						85363			1889																		729203
			4691						81844			79746																		729614
			79745						9322			1632																		730198
			84527						10024			10455																		767566
			10961						59341			1893																		767583
			148156						7253			23392																		767609
			378938						441631			51295																		767610
			400581						54084			1896																		768217
			4536						706			10085																		100033425
			90102						55020			1908																		100033441
			84656						7277			1910																		100033449
			4538						79861			1915																		100033454
			79818						81027			1917																		100033456
			26057						10628			51603																		100033811
			1436						1890			1936																		100033817
			79781						7305			196483																		100049587
			10203						11065			60678																		100113380
			171586						134111			79825																		100113381
			11057						127733			2202																		100113389
			285671						7345			30008																		100124516
			23253						7351			1946																		100126302
			6897						150147			1947																		100126324
			51099						201294			23167																		100126350
			100128325						100534592			1956																		100128164
			4760						391627			112399																		100128327
			58158						2837			254102																		100128750
			147694						100133957			30845																		100130451
			50939						6843			30844																		100130742
			2101						10791			1962																		100130887
			23243						8673			79813																		100131117
			8763						7408			10919																		100131801
			9332						1462			163126																		100132529
			84079						7421			10289																		100133545
			124220						7424			27102																		100134229
			11146						27287			8891																		100144595
			79901						7425			1965																		100170229
			51030						391104			1968																		100270680
			64844						7431			255308																		100270847
			10299						100128881			3646																		100271226
			55016						7444			8665																		100271404
			57472						11326			27335																		100288911
			643836						7447			1974																		100289373
			23019						222008			1977																		100289509
			4763						285878			9470																		100302119
			9745						387804			317649																		100302124
			57720						200403			1978																		100302150
			9337						7454			1979																		100302205
			8672						10163			8672																		100302226
			196913						401551			7458																		100303491
			1982						7465			56648																		100303755
			1981						124857			57535																		100316868
			317649						25861			222223																		100379249
			10241						7456			1993																		100420351
			9092						25937			1996																		100422833
			6444						7504			1997																		100422852
			84503						10413			2000																		100422936
			55662						8531			2002																		100423020
			100505929						114821			2004																		100423039
			10015						9278			9844																		100500812
			58155						100128927			55531																		100500831
			219988						80149			6924																		100500841
			9991						56829			54898																		100500857
			91689						219654			6785																		100500916
			9658						9839			60481																		100505797
			84874						7538			79071																		100505854
			117178						677			26610																		100506157
			10924						678			54859																		100506343
			6655						22882			23065																		100506421
			1524						79698			55831																		100506736
			6602						7764			51234																		100506753
			80196						9658			10328																		100506895
			286828						22834			51016																		100507003
			51343						729747			197342																		100507135
			22847									129080																		100507266
			100289333									11117																		100507435
			4810									90187																		100507475
			5930									2009																		100507533
			55757									24139																		100507612
			4232									400954																		100526737
			56886									2012																		100526783
			91893									2014																		100528019
			56254									2016																		100528020
			404216									2018																		100529211
			153572									196047																		100529261
			9501									55740																		100532746
			101060544									8507																		100533182
			30819									2021																		100533619
			5334									284131																		100534595
			79191									2023																		100534599
			7296									2026																		100616266
			23228									58478																		100847023
			100506475									5168																		100861519
			445									59084																		100874031
			105374928									133121																		100874296
			10957									2029																		100885776
			55629									9583																		100996928
			8451									955																		101752400
			57096									56943																		101926895
			51199									91966																		101926977
			4082									541578																		101927000
			2743									2036																		101927167
			4332									23136																		101927221
			25974									57669																		101927323
			643866									26122																		101927380
			374286									54749																		101927597
			439927									1969																		101927868
			23173									2043																		101927870
			51228									2044																		101928043
			100507321									2046																		101928244
			92344									2048																		101928346
			729852									2050																		101928659
			7940									2051																		101928689
			91351									2052																		101928707
			55009									253152																		101928725
			2801									9852																		101928963
			6658									2060																		101929427
			1910									2059																		101929746
			10550									54869																		101929759
			162966									26284																		101929760
			55553									2064																		101930162
			51125									2065																		101930370
			151188									2067																		102157402
			2180									2074																		102723483
			5965									90459																		102724532
			2182									10613																		103695363
			2181									11160																		103695364
			339123									57471																		105274304
			58495									2081																		105369438
			23589									56605																		105369779
			10142									10961																		105369865
			1295									2099																		105369921
			57763									80004																		105371083
			79872									2104																		105371184
			56271									23344																		105371506
			54929									2108																		105371620
			63941									2110																		105372290
			5137									64850																		105372419
			10194									2114																		105373984
			51701									2119																		105374676
			64395									2121																		105375261
			57486									132884																		105377003
			8968									115704																		105377540
			2824									55763																		105377606
			26039									11336																		105377623
			6477									149371																		105378716
			400506									118460																		105378732
			115265									5393																		105378828
			100131096									2134																		105379132
			54149									2135																		106144529
			55970									2137																		106478957
			36									2138																		106478991
			84875									2139																		106479474
			10896									2070																		106479575
			55704									2146																		106480033
			57552									7430																		106480042
			10735									2159																		106480189
			2804									2149																		106480868
			60487									2152																		106481428
			4213									79152																		106481583
			282808									2166																		106481761
			9022									199990																		107984285
			100506866									2170																		107984813
			50700									2171																		107985565
			2664									2173																		107985885
			79072									3995																		109616991
			2665									283985																		109617002
			23197									23197																		109729184
			192666									2184																		110091775
			54474									81889																		112441434
			122416									151313																		116435299
			9852									23017																		116435300
			23530									284611																		57147
			56311									90736																		51
			4126									11170																		53
			3275									63901																		86
			150677									10827																		91
			3881									81558																		98
			9363									79607																		112
			83452									54954																		203
			84752									159091																		225
			79738									84668																		270
			93010									285172																		369
			29969									9715																		392
			113000									286499																		403
			8688									220965																		419
			27079									728215																		521
			744									729830																		563
			79369									84140																		581
			285367									26355																		585
			10331									221303																		593
			51322									83648																		659
			60493									130074																		770
			10678									221061																		794
			220382									165215																		811
			527									83989																		820
			167227									345757																		825
			406									400451																		830
			57151									220382																		833
			2833									79632																		834
			3579									27146																		838
			8036									9413																		859
			11183									54757																		881
			8491									9917																		889
			771									29902																		902
			770									63939																		914
			10859									203259																		987
			10288									84792																		1089
			127435									57613																		1173
			10990									219738																		1188
			55015									60343																		1203
			3875									10447																		1238
			1379									163933																		1262
			10395									112703																		1317
			9320									199870																		1327
			8851									286336																		1337
			100506070									149297																		1431
			5383									145773																		1493
			3069									375061																		1558
			10518									25940																		1573
			5926									283742																		1581
			51742									147965																		1600
			9804									2176																		1610
			79694									2188																		1622
			55314									2189																		1670
			9232									57697																		1727
			100506696									92565																		1728
			121006									55711																		1773
			140885									10160																		1786
			11314									2193																		1805
			100505890									10056																		1871
			7248									355																		1872
			56897									2194																		1946
			121391									2195																		1951
			23505									120114																		1977
			224									84553																		2015
			9581									345630																		2038
			4009									2192																		2077
			84277									129804																		2120
			10994									222235																		2122
			79718									79176																		2158
			285855									80028																		2167
			9844									25827																		2203
			51348									55336																		2218
			63916									80204																		2277
			84922									157574																		2326
			523									115290																		2352
			9563									26263																		2354
			80709									26260																		2580
			594855									23219																		2618
			114908									84085																		2619
			6386									114907																		2629
			85013									254170																		2660
			134218									55030																		2674
			23091									26272																		2677
			379025									93611																		2693
			79882									200933																		2705
			55854									26270																		2735
			3313									26269																		2776
			91452									26268																		2838
			7040									26190																		2848
			3309									55294																		2863
			5727									2212																		2897
			23317									2217																		2909
			100862697									23149																		2931
			1741									115548																		2958
			9231									197258																		2960
			54431									2235																		2971
			57642									10116																		3015
			7045									56929																		3036
			101927547									2241																		3120
			59351									90342																		3190
			57572									10979																		3290
			58487									83706																		3316
			80005									2242																		3320
			79772									105369550																		3382
			101927769									9638																		3416
			126393									9637																		3437
			23348									121512																		3459
			81704									55785																		3486
			85440									2256																		3562
			1994									2257																		3565
			1993									2258																		3661
			26054									2259																		3706
			57337									2247																		3775
			217									2254																		3783
			29066									2260																		3792
			81832									26127																		3837
			11201									2264																		3856
			117196									53834																		3859
			2990									55277																		3883
			55681									2267																		3888
			3006									2268																		3938
			2244									2271																		4008
			9711									2274																		4012
			10102									29109																		4112
			51181									80206																		4114
			8289									387758																		4118
			59343									9158																		4130
			101927770									9896																		4150
			9113									51024																		4160
			2268									60681																		4163
			10712									55033																		4191
			26524									23770																		4542
			23022									2316																		4622
			388610									10211																		4626
			92370									2319																		4670
			51747									2322																		4686
			1794									55640																		4707
			55784									114984																		4710
			23421									342184																		4817
			101927787									752																		4821
			64407									2332																		4925
			28514									64122																		4927
			3329									54874																		4931
			29966									643988																		4991
			8204									22862																		5009
			56675									64778																		5010
			10423									64838																		5036
			11101									252995																		5092
			9589									54914																		5095
			54557									2346																		5104
			146223									2302																		5217
			5376									2305																		5271
			5150									2308																		5286
			466									55572																		5294
			1386									2357																		5300
			10248									2483																		5315
			2764									122786																		5338
			22950									9758																		5406
			51145									10817																		5442
			50848									10129																		5481
			6689									6624																		5498
			23285									79187																		5504
			84162									11167																		5553
			29110									10272																		5564
			64579									23105																		5593
			719									2495																		5612
			55578									2512																		5720
			79971									79068																		5723
			63876									24140																		5726
			64422									139341																		5741
			10778									84750																		5782
			5256									9513																		5789
			283601									5349																		5800
			84188									53827																		5890
			121355									53822																		5891
			8935									79443																		5926
			55218									2534																		5961
			7264									8321																		6009
			157313									2535																		6132
			83461									7976																		6135
			1381									8322																		6165
			2626									10146																		6169
			5322									9908																		6175
			29994									139716																		6281
			2623									23710																		6307
			7941									9568																		6439
			23136									2551																		6449
			154214									126626																		6457
			56034									2554																		6576
			400541									2555																		6613
			148756									2557																		6621
			80298									2560																		6638
			4051									2561																		6707
			7026									2563																		6721
			101927221									2564																		6857
			100129129									2565																		6888
			285852									2566																		6895
			120114									2571																		6908
			55182									2572																		6921
			64333									4616																		6985
			54893									10912																		6998
			54545									130589																		7038
			57474									55568																		7104
			392									63917																		7126
			101927482									114805																		7133
			3226									79623																		7249
			54797									64409																		7253
			9440									11226																		7317
			55251									168391																		7323
			9282									2596																		7401
			9229									2597																		7428
			22981									84253																		7479
			115294									2617																		7581
			441094									8522																		7596
			11177									729085																		7693
			80306									57459																		7705
			9439									2628																		7743
			9056									2629																		7753
			51550									57704																		7755
			23538									2633																		7756
			57222									2634																		7763
			23418									2635																		7782
			142891									6936																		7913
			4942									2643																		8019
			25923									2645																		8028
			64225									93953																		8030
			1058									54332																		8214
			6542									51573																		8239
			1060									392255																		8365
			4893									2664																		8420
			7486									284161																		8464
			245812									54857																		8481
			2487									2669																		8513
			55669									439																		8537
			57688									2670																		8550
			168544									85476																		8630
			154075									54438																		8637
			140831									81577																		8673
			54959									9945																		8736
			93653									2675																		8738
			11051									23062																		8826
			285550									79017																		8844
			51347									8836																		8892
			57551									2686																		8893
			55500									27069																		9110
			55835									2690																		9140
			7871									26157																		9141
			79019									116254																		9197
			55720									51659																		9202
			51379									10755																		9294
			1384									2697																		9324
			946									2705																		9329
			285527									2706																		9372
			8778									10804																		9390
			388403									57165																		9403
			64109									57369																		9457
			283849									80318																		9482
			4664									113263																		9570
			255027									26035																		9587
			26046									2731																		9649
			113201									342035																		9650
			390916									2734																		9685
			200035									2735																		9729
			131870									2736																		9765
			353274									2737																		9774
			55149									169792																		9784
			55311									11146																		9793
			10224									2743																		9816
			8999									51022																		9897
			653423									2744																		9909
			123036									27165																		9933
			47									144423																		9982
			90594									2746																		9988
			27163									2747																		10054
			100652768									2752																		10090
			11000									84656																		10153
			3572									64395																		10157
			10657									10691																		10194
			138307									51053																		10197
			53358									2766																		10241
			1750									51292																		10276
			119385									8833																		10280
			259282									2768																		10325
			8825									10672																		10327
			1557									9630																		10346
			55327									2770																		10422
			11151									2771																		10463
			283284									2773																		10552
			90390									2778																		10563
			9987									2782																		10574
			55449									10681																		10580
			9908									2791																		10650
			56950									55970																		10652
			5232									100289178																		10694
			23090									2787																		10744
			80381									2788																		10745
			402483									2794																		10753
			3257									29889																		10798
			4898									54552																		10806
			10092									84572																		10809
			25998									2799																		10814
			10109									2801																		10847
			1657									643707																		10869
			23312									27333																		10885
			116840									51280																		10952
			8473									51026																		10988
			503542									57120																		11009
			3688									26003																		11016
			90411									2805																		11113
			136332									2806																		11144
			3684									8733																		11164
			4926									57678																		11165
			8773									84803																		11174
			3689									253635																		11325
			23272									63906																		11333
			3683									54865																		22818
			23554									2239																		22864
			51463									2262																		22894
			3087									56261																		22938
			9156									23171																		22974
			117289									2820																		22979
			55291									2821																		22983
			3687									27238																		22997
			54									2822																		23002
			3685									2835																		23013
			9342									7107																		23087
			80184									283554																		23142
			64718									4935																		23231
			10096									344758																		23262
			221710									57512																		23281
			9669									26996																		23293
			10097									2842																		23335
			643155									2827																		23382
			317									2859																		23399
			3676									2861																		23410
			546									9290																		23412
			10598									2830																		23456
			9542									83873																		23468
			317761									54329																		23568
			8455									100528062																		23598
			220074									114928																		23617
			50484									55890																		23632
			53904									285513																		23704
			8516									26086																		23787
			3937									63940																		25771
			3678									84706																		25804
			3936									2876																		25822
			284422									2878																		25850
			100129858									57476																		25852
			6093									54762																		25870
			220906									196996																		25894
			25898									65983																		25911
			998									386597																		25973
			222658									2891																		26043
			342371									2892																		26061
			7458									2893																		26128
			2534									2894																		26137
			3178									2897																		26223
			1975									2903																		26277
[truncated: 3,347 more rows]

## Sheet: Supplementary Table S2
Supplementary Table 2: The 121 proteins identified in this review that have been implicated in Transcriptomic, Epigenomic and Proteomic data in ASD.
ENTREZ ID	Gene Name	Gene Description
100049587	SIGLEC14	sialic acid binding Ig like lectin 14 [Source:HGNC Symbol;Acc:HGNC:32926]
10128	LRPPRC	leucine rich pentatricopeptide repeat containing [Source:HGNC Symbol;Acc:HGNC:15714]
10327	AKR1A1	aldo-keto reductase family 1 member A1 [Source:HGNC Symbol;Acc:HGNC:380]
10391	CORO2B	coronin 2B [Source:HGNC Symbol;Acc:HGNC:2256]
10492	SYNCRIP	synaptotagmin binding cytoplasmic RNA interacting protein [Source:HGNC Symbol;Acc:HGNC:16918]
10551	AGR2	"anterior gradient 2, protein disulphide isomerase family member [Source:HGNC Symbol;Acc:HGNC:328]"
10627	MYL12A	myosin light chain 12A [Source:HGNC Symbol;Acc:HGNC:16701]
10631	POSTN	periostin [Source:HGNC Symbol;Acc:HGNC:16953]
1072	CFL1	cofilin 1 [Source:HGNC Symbol;Acc:HGNC:1874]
10982	MAPRE2	microtubule associated protein RP/EB family member 2 [Source:HGNC Symbol;Acc:HGNC:6891]
11200	CHEK2	checkpoint kinase 2 [Source:HGNC Symbol;Acc:HGNC:16627]
114798	SLITRK1	SLIT and NTRK like family member 1 [Source:HGNC Symbol;Acc:HGNC:20297]
1153	CIRBP	cold inducible RNA binding protein [Source:HGNC Symbol;Acc:HGNC:1982]
120892	LRRK2	leucine rich repeat kinase 2 [Source:HGNC Symbol;Acc:HGNC:18618]
1361	CPB2	carboxypeptidase B2 [Source:HGNC Symbol;Acc:HGNC:2300]
1404	HAPLN1	hyaluronan and proteoglycan link protein 1 [Source:HGNC Symbol;Acc:HGNC:2380]
1432	MAPK14	mitogen-activated protein kinase 14 [Source:HGNC Symbol;Acc:HGNC:6876]
1738	DLD	dihydrolipoamide dehydrogenase [Source:HGNC Symbol;Acc:HGNC:2898]
1742	DLG4	discs large MAGUK scaffold protein 4 [Source:HGNC Symbol;Acc:HGNC:2903]
1805	DPT	dermatopontin [Source:HGNC Symbol;Acc:HGNC:3011]
1828	DSG1	desmoglein 1 [Source:HGNC Symbol;Acc:HGNC:3048]
1946	EFNA5	ephrin A5 [Source:HGNC Symbol;Acc:HGNC:3225]
1956	EGFR	epidermal growth factor receptor [Source:HGNC Symbol;Acc:HGNC:3236]
213	ALB	albumin [Source:HGNC Symbol;Acc:HGNC:399]
2158	F9	coagulation factor IX [Source:HGNC Symbol;Acc:HGNC:3551]
2264	FGFR4	fibroblast growth factor receptor 4 [Source:HGNC Symbol;Acc:HGNC:3691]
23122	CLASP2	cytoplasmic linker associated protein 2 [Source:HGNC Symbol;Acc:HGNC:17078]
23136	EPB41L3	erythrocyte membrane protein band 4.1 like 3 [Source:HGNC Symbol;Acc:HGNC:3380]
2319	FLOT2	flotillin 2 [Source:HGNC Symbol;Acc:HGNC:3758]
23344	ESYT1	extended synaptotagmin 1 [Source:HGNC Symbol;Acc:HGNC:29534]
23767	FLRT3	fibronectin leucine rich transmembrane protein 3 [Source:HGNC Symbol;Acc:HGNC:3762]
25852	ARMC8	armadillo repeat containing 8 [Source:HGNC Symbol;Acc:HGNC:24999]
26999	CYFIP2	cytoplasmic FMR1 interacting protein 2 [Source:HGNC Symbol;Acc:HGNC:13760]
27067	STAU2	staufen double-stranded RNA binding protein 2 [Source:HGNC Symbol;Acc:HGNC:11371]
2775	GNAO1	G protein subunit alpha o1 [Source:HGNC Symbol;Acc:HGNC:4389]
2805	GOT1	glutamic-oxaloacetic transaminase 1 [Source:HGNC Symbol;Acc:HGNC:4432]
2810	SFN	stratifin [Source:HGNC Symbol;Acc:HGNC:10773]
2820	GPD2	glycerol-3-phosphate dehydrogenase 2 [Source:HGNC Symbol;Acc:HGNC:4456]
285	ANGPT2	angiopoietin 2 [Source:HGNC Symbol;Acc:HGNC:485]
287	ANK2	ankyrin 2 [Source:HGNC Symbol;Acc:HGNC:493]
2891	GRIA2	glutamate ionotropic receptor AMPA type subunit 2 [Source:HGNC Symbol;Acc:HGNC:4572]
2923	PDIA3	protein disulfide isomerase family A member 3 [Source:HGNC Symbol;Acc:HGNC:4606]
2949	GSTM5	glutathione S-transferase mu 5 [Source:HGNC Symbol;Acc:HGNC:4637]
29968	PSAT1	phosphoserine aminotransferase 1 [Source:HGNC Symbol;Acc:HGNC:19129]
3002	GZMB	granzyme B [Source:HGNC Symbol;Acc:HGNC:4709]
3146	HMGB1	high mobility group box 1 [Source:HGNC Symbol;Acc:HGNC:4983]
3163	HMOX2	heme oxygenase 2 [Source:HGNC Symbol;Acc:HGNC:5014]
3190	HNRNPK	heterogeneous nuclear ribonucleoprotein K [Source:HGNC Symbol;Acc:HGNC:5044]
3303	HSPA1A	heat shock protein family A (Hsp70) member 1A [Source:HGNC Symbol;Acc:HGNC:5232]
3313	HSPA9	heat shock protein family A (Hsp70) member 9 [Source:HGNC Symbol;Acc:HGNC:5244]
3326	HSP90AB1	heat shock protein 90 alpha family class B member 1 [Source:HGNC Symbol;Acc:HGNC:5258]
3383	ICAM1	intercellular adhesion molecule 1 [Source:HGNC Symbol;Acc:HGNC:5344]
3418	IDH2	isocitrate dehydrogenase (NADP(+)) 2 [Source:HGNC Symbol;Acc:HGNC:5383]
355	FAS	Fas cell surface death receptor [Source:HGNC Symbol;Acc:HGNC:11920]
3572	IL6ST	interleukin 6 signal transducer [Source:HGNC Symbol;Acc:HGNC:6021]
3700	ITIH4	inter-alpha-trypsin inhibitor heavy chain 4 [Source:HGNC Symbol;Acc:HGNC:6169]
3708	ITPR1	"inositol 1,4,5-trisphosphate receptor type 1 [Source:HGNC Symbol;Acc:HGNC:6180]"
3939	LDHA	lactate dehydrogenase A [Source:HGNC Symbol;Acc:HGNC:6535]
4000	LMNA	lamin A/C [Source:HGNC Symbol;Acc:HGNC:6636]
4048	LTA4H	leukotriene A4 hydrolase [Source:HGNC Symbol;Acc:HGNC:6710]
4133	MAP2	microtubule associated protein 2 [Source:HGNC Symbol;Acc:HGNC:6839]
4191	MDH2	malate dehydrogenase 2 [Source:HGNC Symbol;Acc:HGNC:6971]
47	ACLY	ATP citrate lyase [Source:HGNC Symbol;Acc:HGNC:115]
478	ATP1A3	ATPase Na+/K+ transporting subunit alpha 3 [Source:HGNC Symbol;Acc:HGNC:801]
488	ATP2A2	ATPase sarcoplasmic/endoplasmic reticulum Ca2+ transporting 2 [Source:HGNC Symbol;Acc:HGNC:812]
5034	P4HB	prolyl 4-hydroxylase subunit beta [Source:HGNC Symbol;Acc:HGNC:8548]
506	ATP5F1B	ATP synthase F1 subunit beta [Source:HGNC Symbol;Acc:HGNC:830]
5104	SERPINA5	serpin family A member 5 [Source:HGNC Symbol;Acc:HGNC:8723]
51692	CPSF3	cleavage and polyadenylation specific factor 3 [Source:HGNC Symbol;Acc:HGNC:2326]
5294	PIK3CG	"phosphatidylinositol-4,5-bisphosphate 3-kinase catalytic subunit gamma [Source:HGNC Symbol;Acc:HGNC:8978]"
5295	PIK3R1	phosphoinositide-3-kinase regulatory subunit 1 [Source:HGNC Symbol;Acc:HGNC:8979]
5315	PKM	pyruvate kinase M1/2 [Source:HGNC Symbol;Acc:HGNC:9021]
54097	FAM3B	FAM3 metabolism regulating signaling molecule B [Source:HGNC Symbol;Acc:HGNC:1253]
5481	PPID	peptidylprolyl isomerase D [Source:HGNC Symbol;Acc:HGNC:9257]
54878	DPP8	dipeptidyl peptidase 8 [Source:HGNC Symbol;Acc:HGNC:16490]
5518	PPP2R1A	protein phosphatase 2 scaffold subunit Aalpha [Source:HGNC Symbol;Acc:HGNC:9302]
5521	PPP2R2B	protein phosphatase 2 regulatory subunit Bbeta [Source:HGNC Symbol;Acc:HGNC:9305]
55540	IL17RB	interleukin 17 receptor B [Source:HGNC Symbol;Acc:HGNC:18015]
55847	CISD1	CDGSH iron sulfur domain 1 [Source:HGNC Symbol;Acc:HGNC:30880]
55937	APOM	apolipoprotein M [Source:HGNC Symbol;Acc:HGNC:13916]
56616	DIABLO	diablo IAP-binding mitochondrial protein [Source:HGNC Symbol;Acc:HGNC:21528]
56896	DPYSL5	dihydropyrimidinase like 5 [Source:HGNC Symbol;Acc:HGNC:20637]
57142	RTN4	reticulon 4 [Source:HGNC Symbol;Acc:HGNC:14085]
5770	PTPN1	protein tyrosine phosphatase non-receptor type 1 [Source:HGNC Symbol;Acc:HGNC:9642]
5935	RBM3	RNA binding motif protein 3 [Source:HGNC Symbol;Acc:HGNC:9900]
6000	RGS7	regulator of G protein signaling 7 [Source:HGNC Symbol;Acc:HGNC:10003]
604	BCL6	BCL6 transcription repressor [Source:HGNC Symbol;Acc:HGNC:1001]
6133	RPL9	ribosomal protein L9 [Source:HGNC Symbol;Acc:HGNC:10369]
6210	RPS15A	ribosomal protein S15a [Source:HGNC Symbol;Acc:HGNC:10389]
64145	RBSN	"rabenosyn, RAB effector [Source:HGNC Symbol;Acc:HGNC:20759]"
6416	MAP2K4	mitogen-activated protein kinase kinase 4 [Source:HGNC Symbol;Acc:HGNC:6844]
6455	SH3GL1	"SH3 domain containing GRB2 like 1, endophilin A2 [Source:HGNC Symbol;Acc:HGNC:10830]"
6457	SH3GL3	"SH3 domain containing GRB2 like 3, endophilin A3 [Source:HGNC Symbol;Acc:HGNC:10832]"
6885	MAP3K7	mitogen-activated protein kinase kinase kinase 7 [Source:HGNC Symbol;Acc:HGNC:6859]
7049	TGFBR3	transforming growth factor beta receptor 3 [Source:HGNC Symbol;Acc:HGNC:11774]
7094	TLN1	talin 1 [Source:HGNC Symbol;Acc:HGNC:11845]
7099	TLR4	toll like receptor 4 [Source:HGNC Symbol;Acc:HGNC:11850]
7133	TNFRSF1B	TNF receptor superfamily member 1B [Source:HGNC Symbol;Acc:HGNC:11917]
7178	TPT1	"tumor protein, translationally-controlled 1 [Source:HGNC Symbol;Acc:HGNC:12022]"
7385	UQCRC2	ubiquinol-cytochrome c reductase core protein 2 [Source:HGNC Symbol;Acc:HGNC:12586]
7415	VCP	valosin containing protein [Source:HGNC Symbol;Acc:HGNC:12666]
759	CA1	carbonic anhydrase 1 [Source:HGNC Symbol;Acc:HGNC:1368]
79026	AHNAK	AHNAK nucleoprotein [Source:HGNC Symbol;Acc:HGNC:347]
79573	TTC13	tetratricopeptide repeat domain 13 [Source:HGNC Symbol;Acc:HGNC:26204]
80017	DGLUCY	D-glutamate cyclase [Source:HGNC Symbol;Acc:HGNC:20498]
805	CALM2	calmodulin 2 [Source:HGNC Symbol;Acc:HGNC:1445]
8239	USP9X	ubiquitin specific peptidase 9 X-linked [Source:HGNC Symbol;Acc:HGNC:12632]
83998	REG4	regenerating family member 4 [Source:HGNC Symbol;Acc:HGNC:22977]
84263	HSDL2	hydroxysteroid dehydrogenase like 2 [Source:HGNC Symbol;Acc:HGNC:18572]
84547	PGBD1	piggyBac transposable element derived 1 [Source:HGNC Symbol;Acc:HGNC:19398]
8536	CAMK1	calcium/calmodulin dependent protein kinase I [Source:HGNC Symbol;Acc:HGNC:1459]
8537	BCAS1	brain enriched myelin associated protein 1 [Source:HGNC Symbol;Acc:HGNC:974]
8615	USO1	USO1 vesicle transport factor [Source:HGNC Symbol;Acc:HGNC:30904]
8803	SUCLA2	succinate-CoA ligase ADP-forming subunit beta [Source:HGNC Symbol;Acc:HGNC:11448]
8826	IQGAP1	IQ motif containing GTPase activating protein 1 [Source:HGNC Symbol;Acc:HGNC:6110]
9201	DCLK1	doublecortin like kinase 1 [Source:HGNC Symbol;Acc:HGNC:2700]
928	CD9	CD9 molecule [Source:HGNC Symbol;Acc:HGNC:1709]
9369	NRXN3	neurexin 3 [Source:HGNC Symbol;Acc:HGNC:8010]
9554	SEC22B	"SEC22 homolog B, vesicle trafficking protein [Source:HGNC Symbol;Acc:HGNC:10700]"
966	CD59	CD59 molecule (CD59 blood group) [Source:HGNC Symbol;Acc:HGNC:1689]
9764	KIAA0513	KIAA0513 [Source:HGNC Symbol;Acc:HGNC:29058]

## Sheet: Supplementary Table S3
Supplementary Table 3: Top 10 Hallmark canonical Pathways enriched in the set of 121 proteins identified in this review that have been shown to be altered on the Transcriptomic, Epigenomic and Proteomic level in ASD.
HALLMARK PATHWAY	FDR Value
MTORC1 SIGNALING	2.66e-07
OXIDATIVE PHOSPHORYLATION	2.66e-07
IL6 JAK STAT3 SIGNALING	4.45e-06
COMPLEMENT	2.17e-05
ESTROGEN RESPONSE LATE	2.17e-05
GLYCOLYSIS	2.17e-05
FATTY ACID METABOLISM	6.24e-05
ADIPOGENESIS	0.000184
ALLOGRAFT REJECTION	0.000184
PI3K AKT MTOR SIGNALING	0.00146

## Sheet: Supplementary Table S4
Supplementary Table 4: The top 10 significantly enriched Transcription Factor Protein-Protein Interactions in the dataset of 121 differentially expressed proteins that are also implicated in both Transcriptomic and DNAm data
Top 10 Transcription Factor Protein-Protein interactions	Adjusted p-value of enrichment	Function	Associated Go Terms and Superpathways
ESR1	4.66e-15	Regulation of eukaryotic gene expression, cellular proliferation and differentiation, Binds to estrogen response elements (ERE) or associates with other transcription factors, such as AP-1/c-Jun, c-Fos, ATF-2, Sp1 and Sp3. , Decreases NF-kappa-B DNA-binding activity and inhibits NF-kappa-B-mediated transcription from the IL6 promoter .	ERK Signaling, GPCR Signalling
CREBP1	1.45e-11	Binds to the cAMP-responsive element (CRE), contributes to DNA damage response, cell development, proliferation and death. In the cytoplasm, interacts with and perturbs HK1- and VDAC1-containing complexes at the mitochondrial outer membrane, thereby impairing mitochondrial membrane potential, inducing mitochondrial leakage and promoting cell death	MAPK Signaling: Oxidative Stress Pathway, Relaxin signaling pathway.
HTT	2.62e-08	Widely expressed and is required for normal development.	Pathways of Neurodegeneration, PI3K / Akt Signaling, Mesodermal Commitment Pathway
TP53	2.4e-07	Responds to diverse cellular stresses to regulate expression of target genes, inducing cell cycle arrest, apoptosis, senescence, DNA repair, or changes in metabolism.	Akt Signaling Pathway, MAPK Signalling: Oxidative Stress Pathway, MTOR Signaling pathways, Apoptosis, GR Network
TP63	6.78e-07	Member of the p53 family of transcription factors. Involved in Notch signaling by probably inducing JAG1 and JAG2	Development NOTCH1-mediated pathway for NF-KB activity modulation, TP53 Regulates Transcription of Cell Death Genes
NR3C1	1.95e-06	Glucocorticoid receptor that binds to glucocorticoid response elements (GRE), both for nuclear and mitochondrial DNA. Affects inflammatory responses, cellular proliferation and differentiation in target tissues. Involved in chromatin remodeling	Signaling by GPCR, PTK6,Adipogenesis, Endoderm Differentiation, FOXA2 and FOXA3 transcription factor networks, Glucocorticoid receptor regulatory network
STAT1	0.000192	Activated by various ligands interferon-alpha, interferon-gamma, EGF, PDGF and IL6, Binds to the IFN gamma activated sequence (GAS) to drive the expression of the target genes	Regulation of lipid metabolism, Insulin signaling-generic cascades, ERK Signaling
HNF1A	0.000276	Transcription factor required for the expression of several liver-specific genes	Human Embryonic Stem Cell Pluripotency , Presenilin action in Notch and Wnt signaling,Regulation of beta-cell development, Glucose / Energy Metabolism, ERK Signaling
ILF3	0.000454	A double-stranded RNA (dsRNA) binding protein that complexes with other proteins, dsRNAs, small noncoding RNAs, and mRNAs to regulate gene expression and stabilize mRNAs.	Gene Ontology (GO) annotations related to this gene include double-stranded RNA binding
PPARGC1A	0.000612	This protein can interact with, and regulate the activities of, cAMP response element binding protein (CREB) and nuclear respiratory factors (NRFs). It provides a direct link between external physiological stimuli and the regulation of mitochondrial biogenesis.	Mitochondrial Gene Expression, Regulation of lipid metabolism by Peroxisome proliferator-activated receptor alpha (PPARalpha), AMP-activated Protein Kinase (AMPK) Signaling
